# Supplementary material
Source: publisher figshare collection journal article supplement (https://acs.figshare.com/ndownloader/files/4757014)

## Supporting Information

### Application of the Aza-Achmatowicz Oxidative Rearrangement for the Stereoselective Synthesis of the Cassia and Prosopis Alkaloid Family

*Carolyn A. Leverett, Michael P. Cassidy and Albert Padwa\**  
*Department of Chemistry, Emory University, Atlanta, GA 30322*

[chemap@emory.edu](mailto:chemap@emory.edu)

**Supporting Information Available:**  $^1\text{H}$  and  $^{13}\text{C}$ -NMR spectra for new compounds lacking elemental analyses. This material is available free of charge *via* the Internet at <http://pubs.acs.org>.

**General Experimental Section Paragraph:** Melting points are uncorrected. Mass spectra were determined at an ionizing voltage of 70eV. Unless otherwise noted, all reactions were performed in flame dried glassware under an atmosphere of dry nitrogen. Solutions were evaporated under reduced pressure with a rotary evaporator and the residue was chromatographed on a silica gel column using an ethyl acetate-hexane mixture as the eluent unless specified otherwise.

#### Table of Contents for Supporting Information:

|     |                                                        |
|-----|--------------------------------------------------------|
| S3  | $^1\text{H}$ -NMR spectrum of compound <b>20</b>       |
| S4  | $^1\text{H}$ -NMR spectrum of compound <b>22</b>       |
| S5  | $^{13}\text{C}$ -NMR spectrum of compound <b>23</b>    |
| S6  | $^1\text{H}$ -NMR spectrum of compound <b>26</b>       |
| S7  | $^1\text{H}$ -NMR spectrum of compound <b>27</b>       |
| S8  | $^1\text{H}$ -NMR spectrum of compound <b>28</b>       |
| S9  | $^{13}\text{C}$ -NMR spectrum of compound <b>29</b>    |
| S10 | $^1\text{H}$ -NMR spectrum of azimic acid ( <b>5</b> ) |

- S11  $^1\text{H}$ -NMR spectrum of compound **19**
- S12  $^1\text{H}$ -NMR spectrum of compound **30**
- S13  $^1\text{H}$ -NMR spectrum of compound **31**
- S14  $^1\text{H}$ -NMR spectrum of precursor to compound **9**
- S15  $^1\text{H}$ -NMR spectrum of deoxocassine (**9**)
- S16  $^1\text{H}$ -NMR spectrum of compound **32**
- S17  $^{13}\text{C}$ -NMR spectrum of precursor to compound **33**
- S18  $^1\text{H}$ -NMR spectrum of compound **33**
- S19  $^1\text{H}$ -NMR spectrum of precursor to compound **34**
- S20  $^1\text{H}$ -NMR spectrum of compound **34**
- S21  $^{13}\text{C}$ -NMR spectrum of precursor to compound **8**
- S22  $^1\text{H}$ -NMR spectrum of cassine (**8**)
- S23  $^1\text{H}$ -NMR spectrum of compound **36**
- S24  $^1\text{H}$ -NMR spectrum of compound **37**
- S25  $^1\text{H}$ -NMR spectrum of compound **38**
- S26  $^1\text{H}$ -NMR spectrum of compound **39**
- S27  $^1\text{H}$ -NMR spectrum of compound **40**
- S28  $^{13}\text{C}$ -NMR spectrum of precursor to compound **7**
- S29  $^1\text{H}$ -NMR spectrum of spicigerine (**7**)
- S30  $^{13}\text{C}$ -NMR spectrum of compound **41**

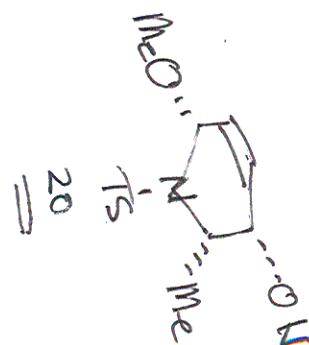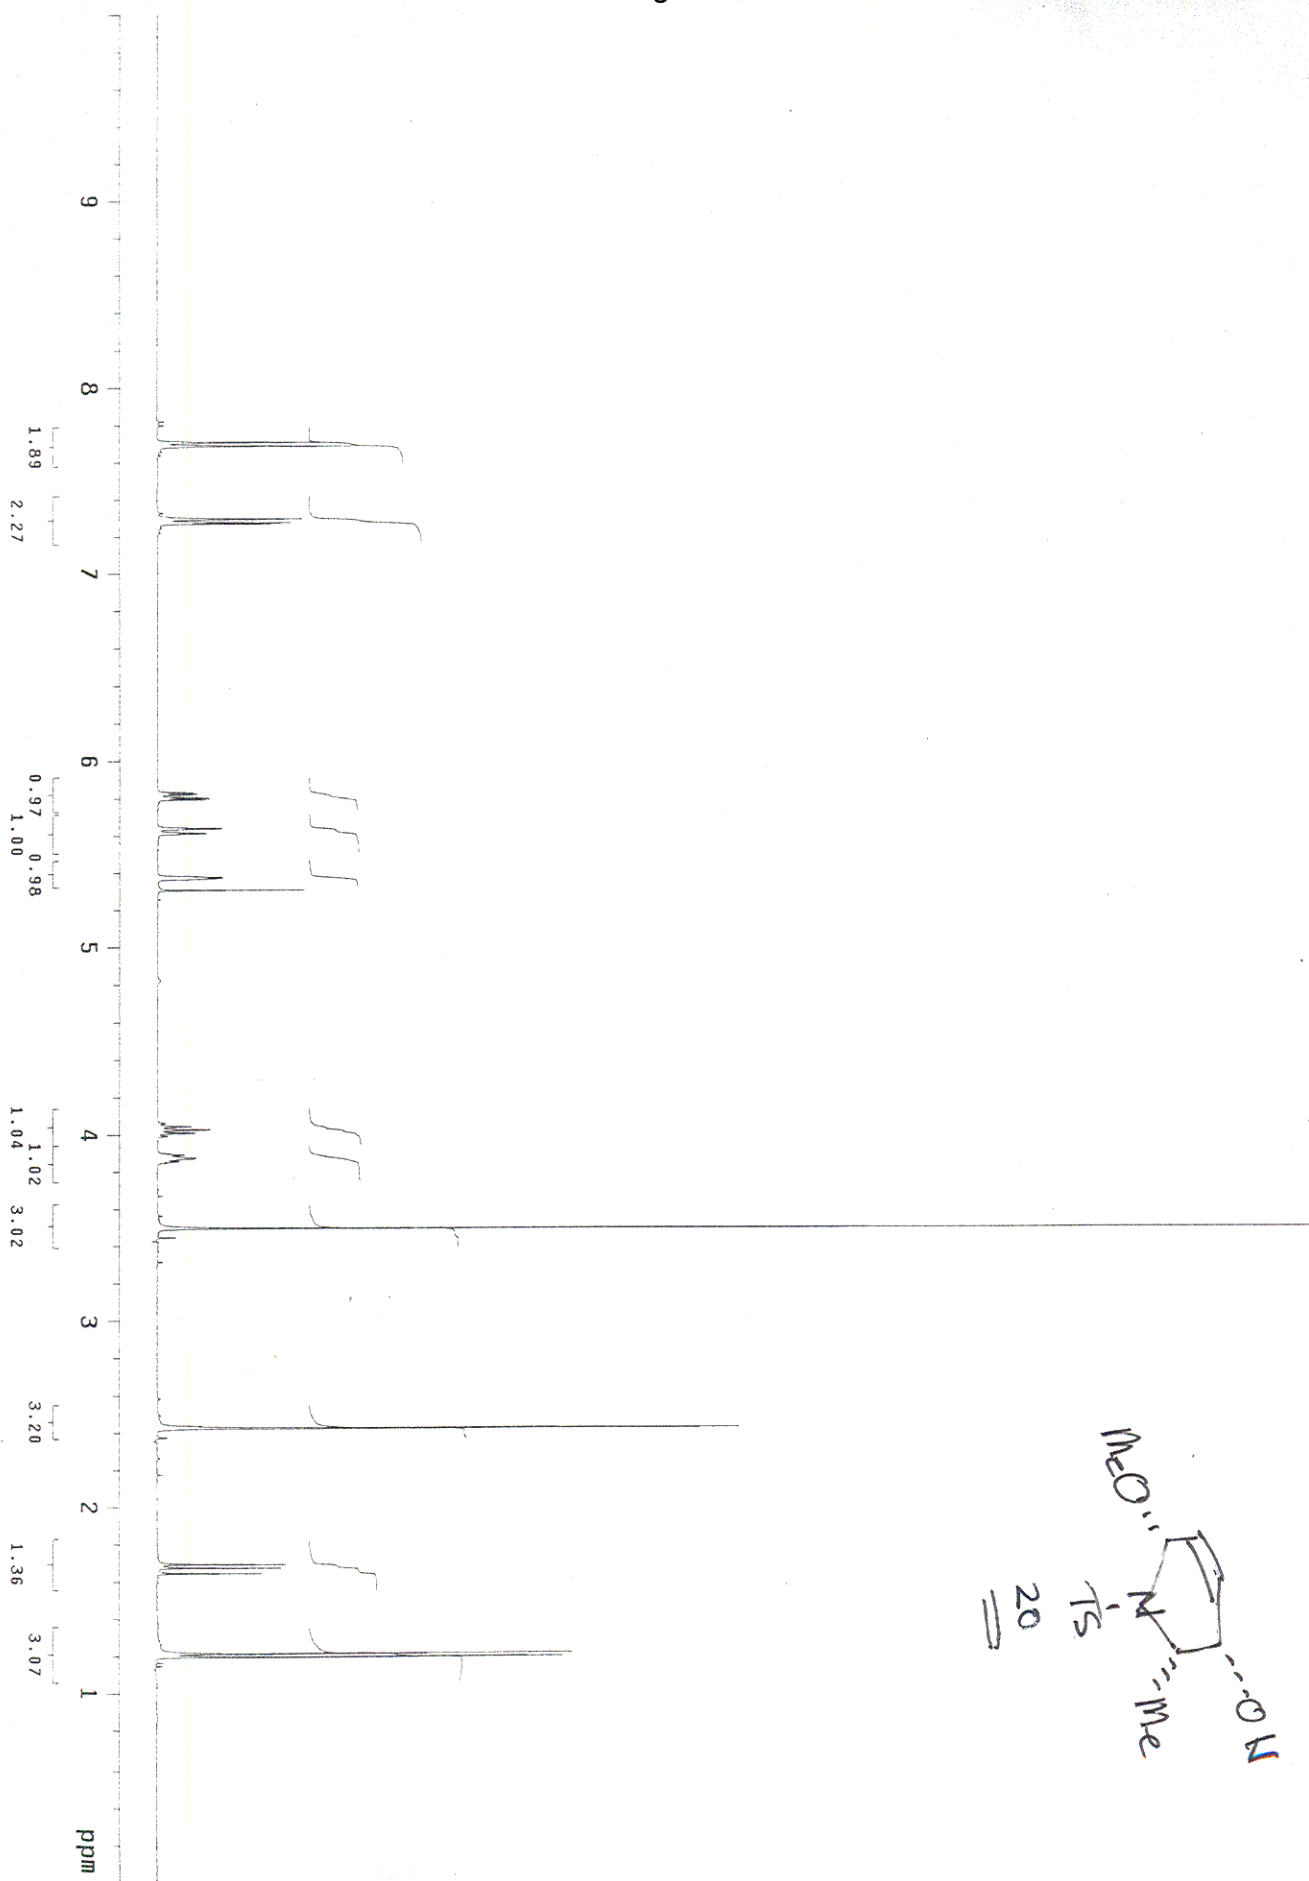

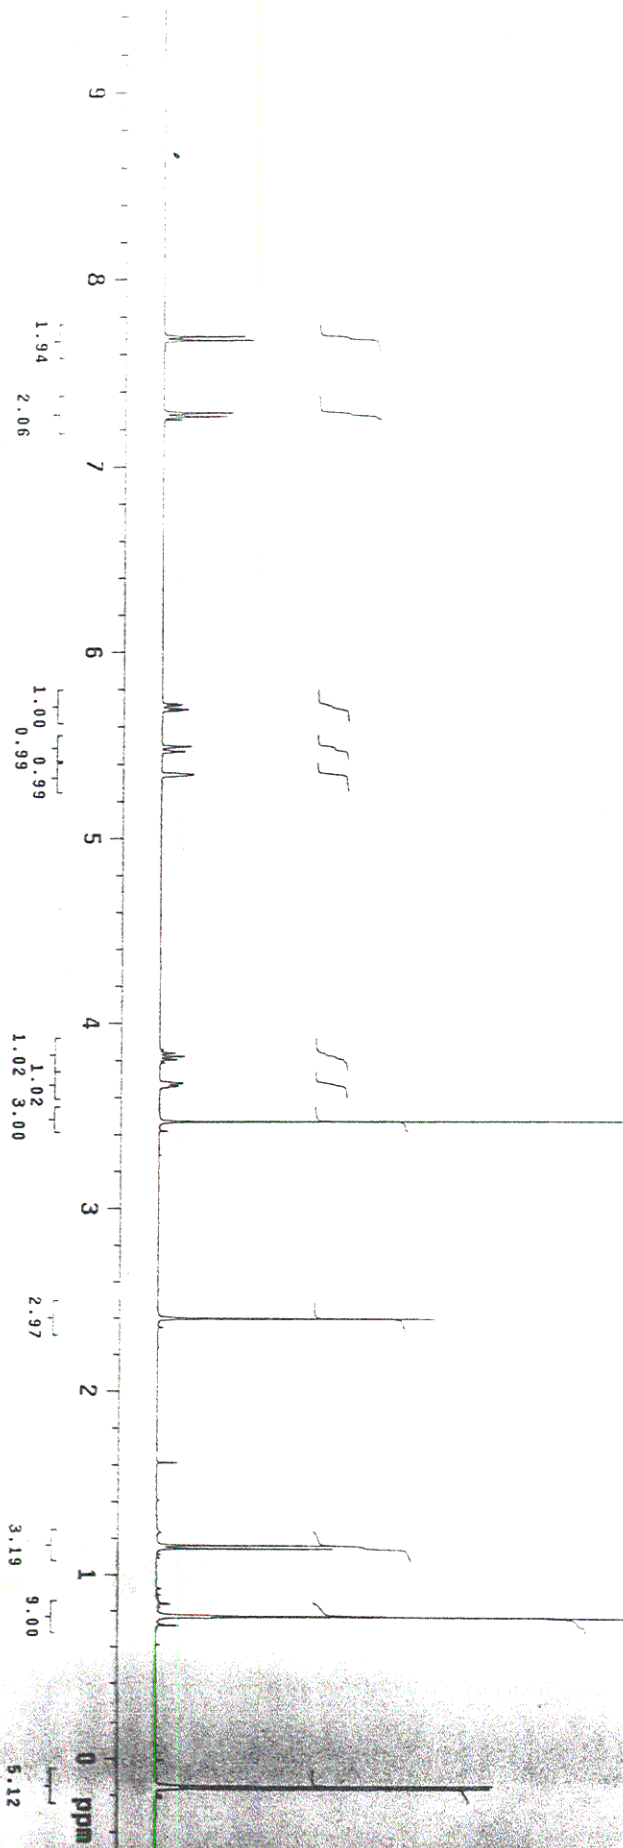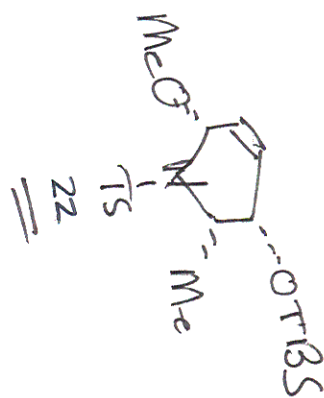

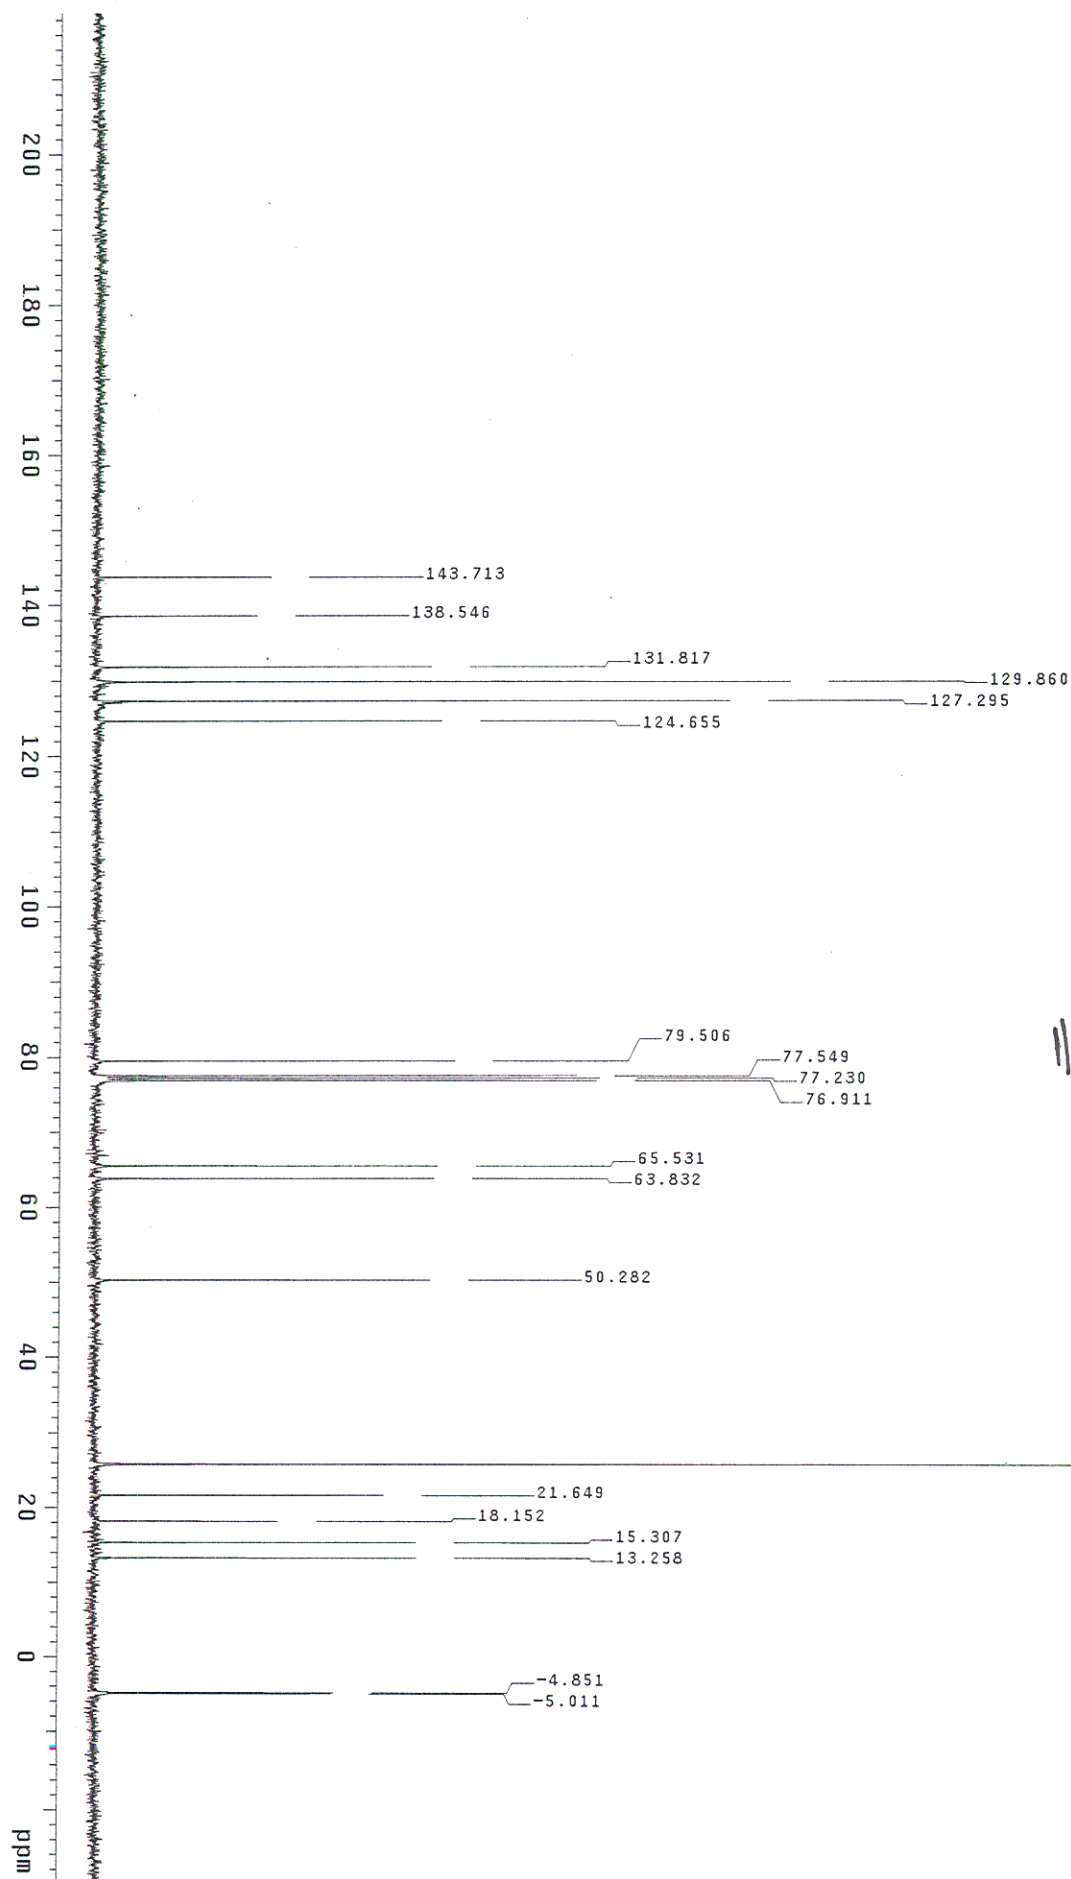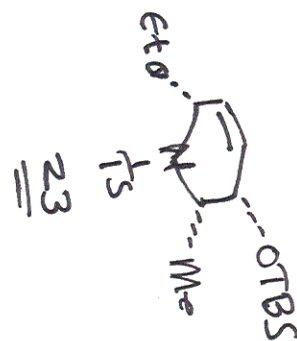

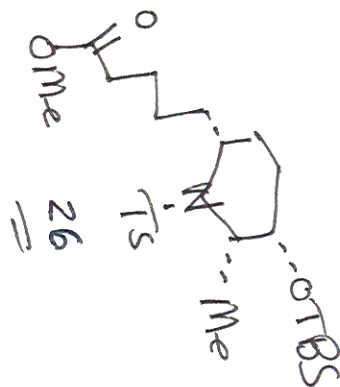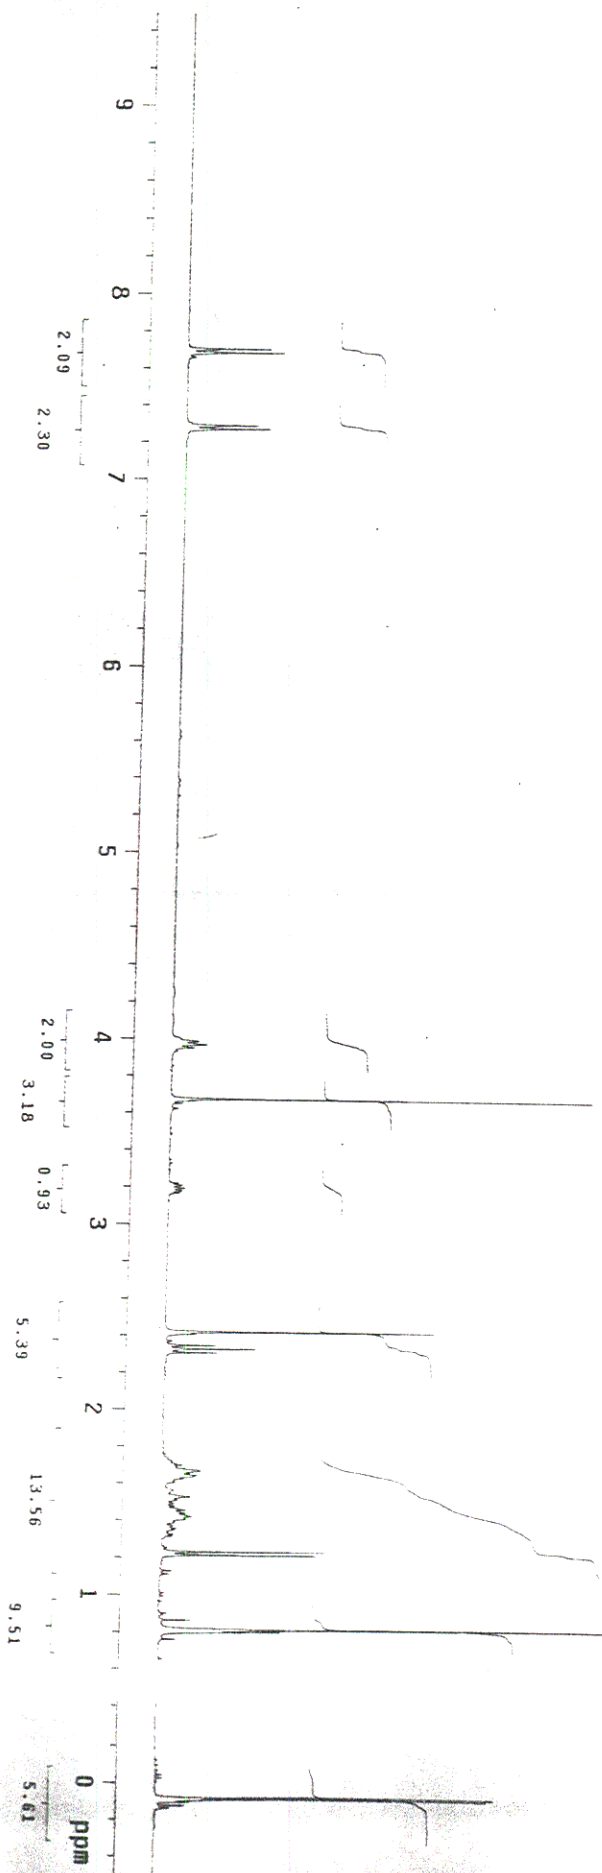

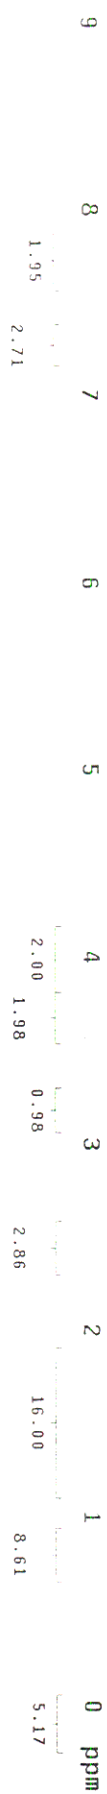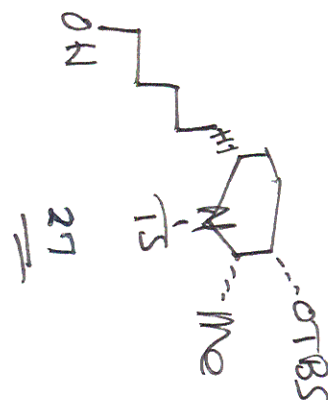

9 8 7 6 5 4 3 2 1 0 ppm

1.90 1.92 2.03 1.00 2.89 2.03 12.98 3.21 8.78 5.17

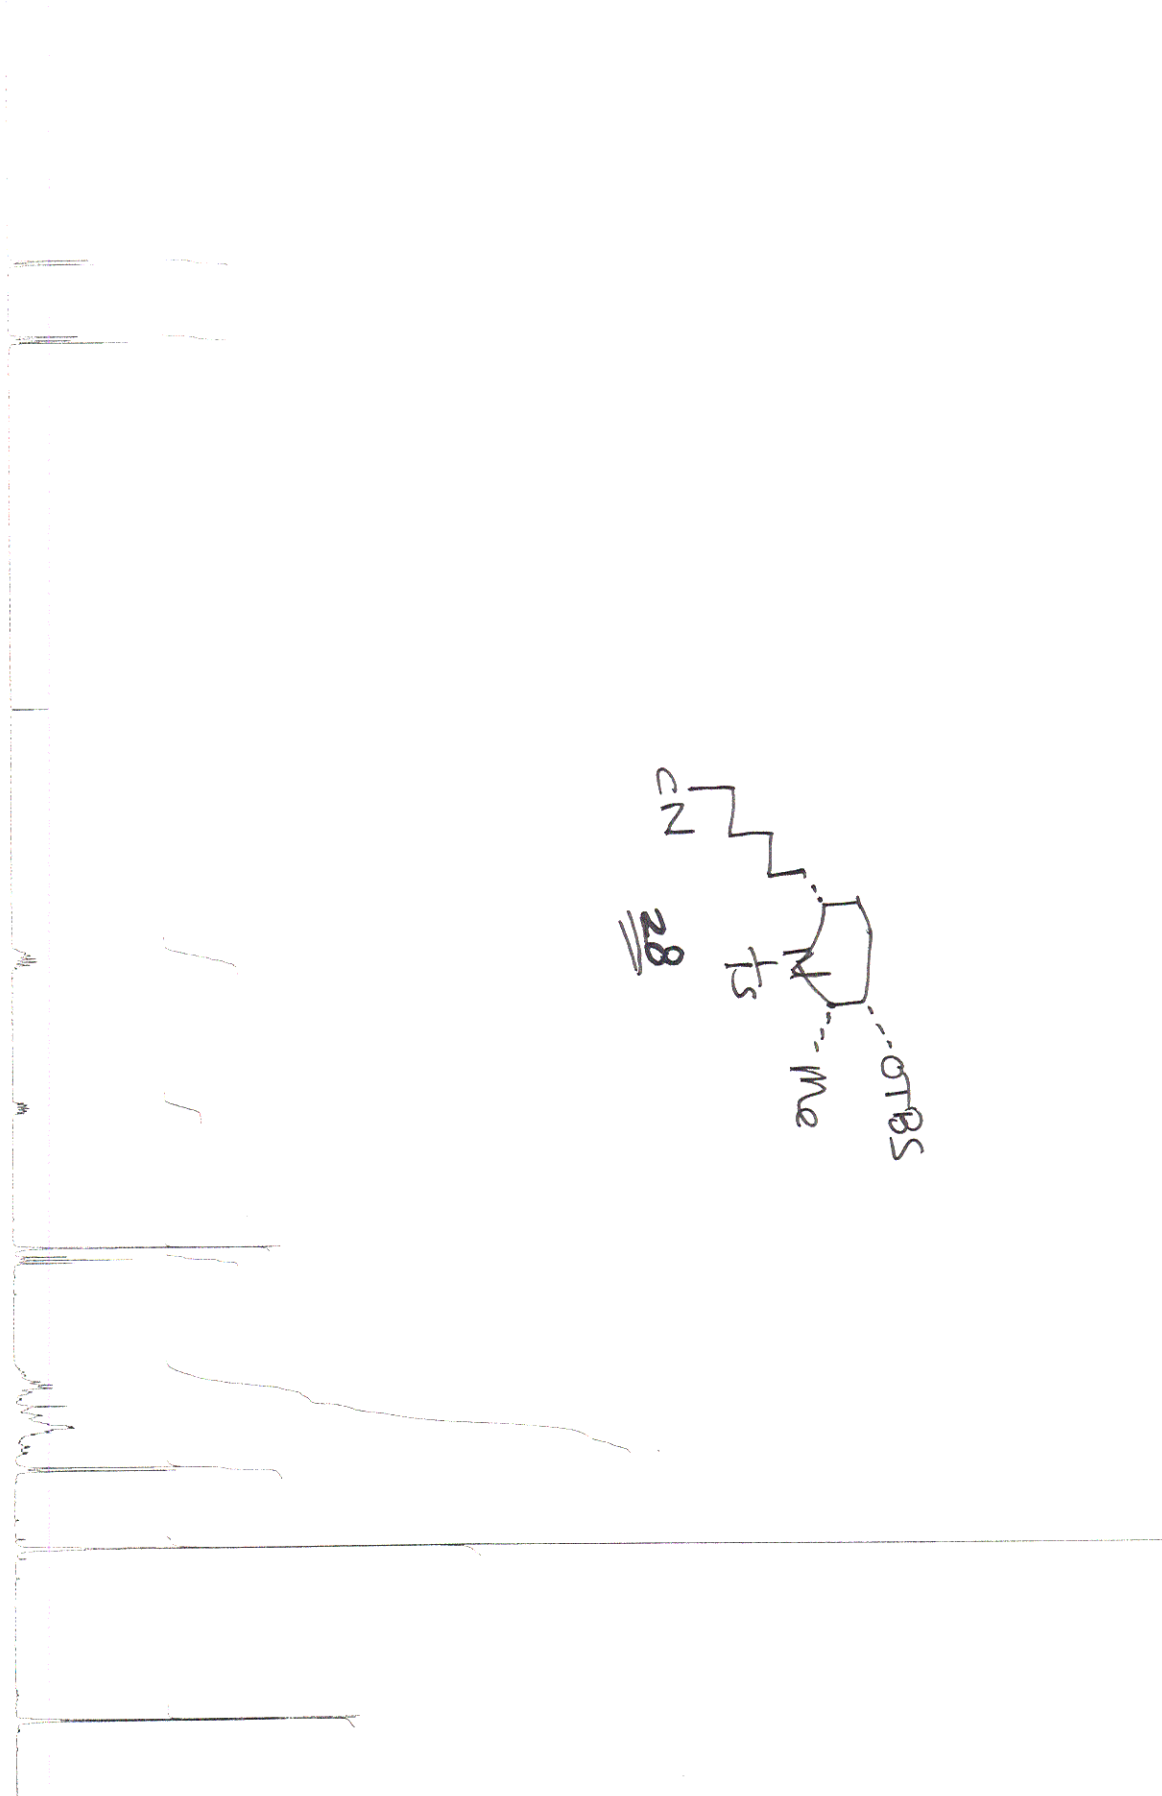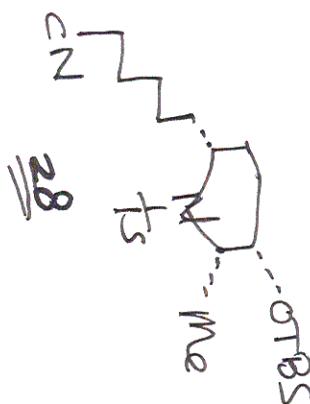



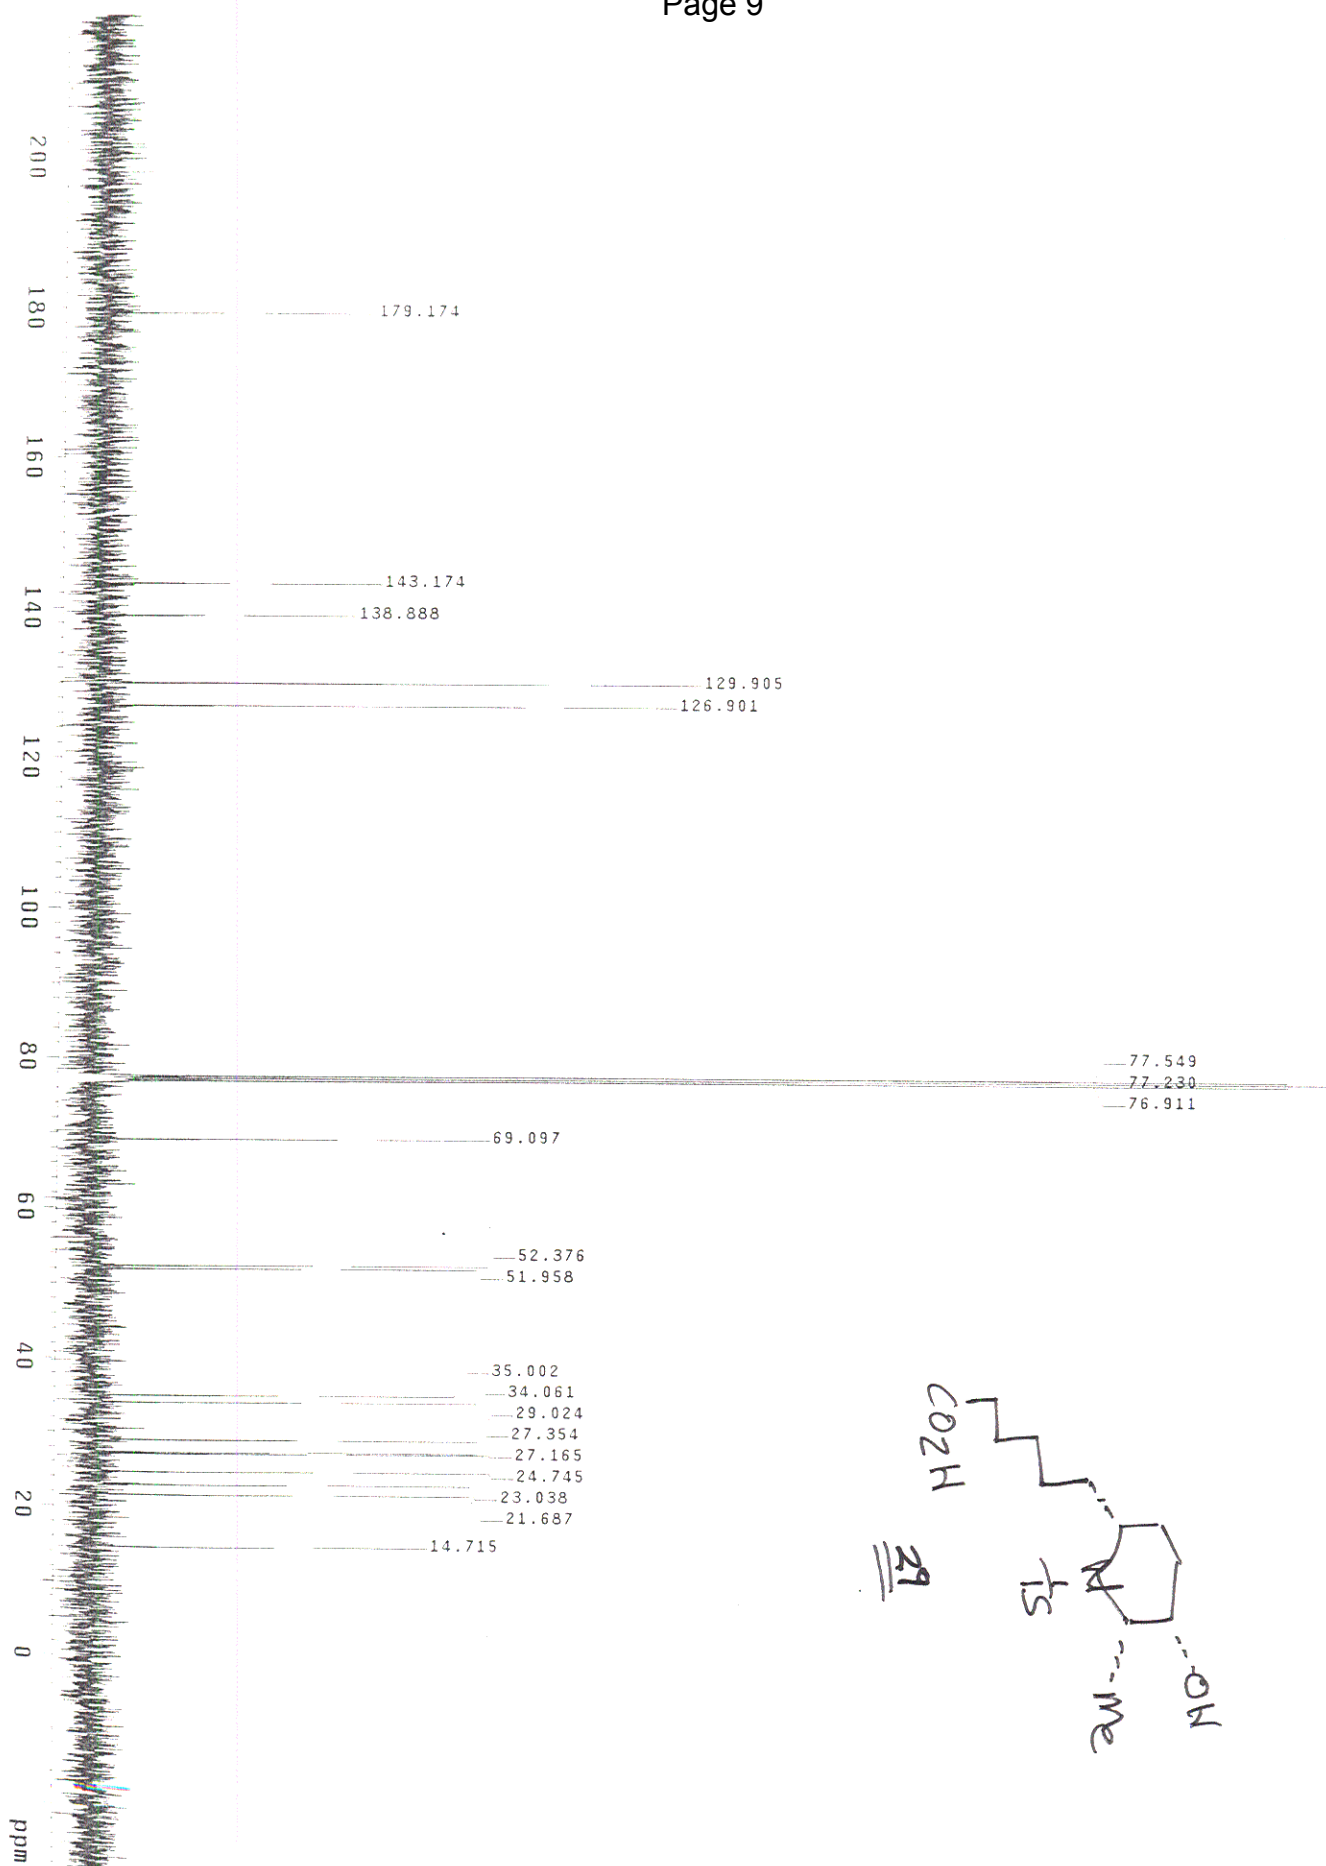

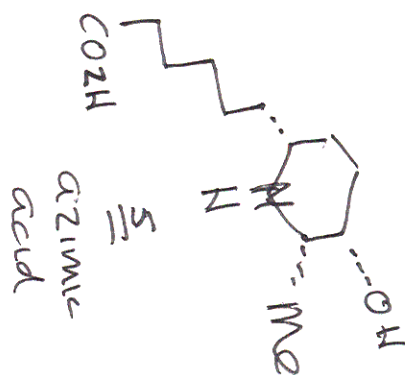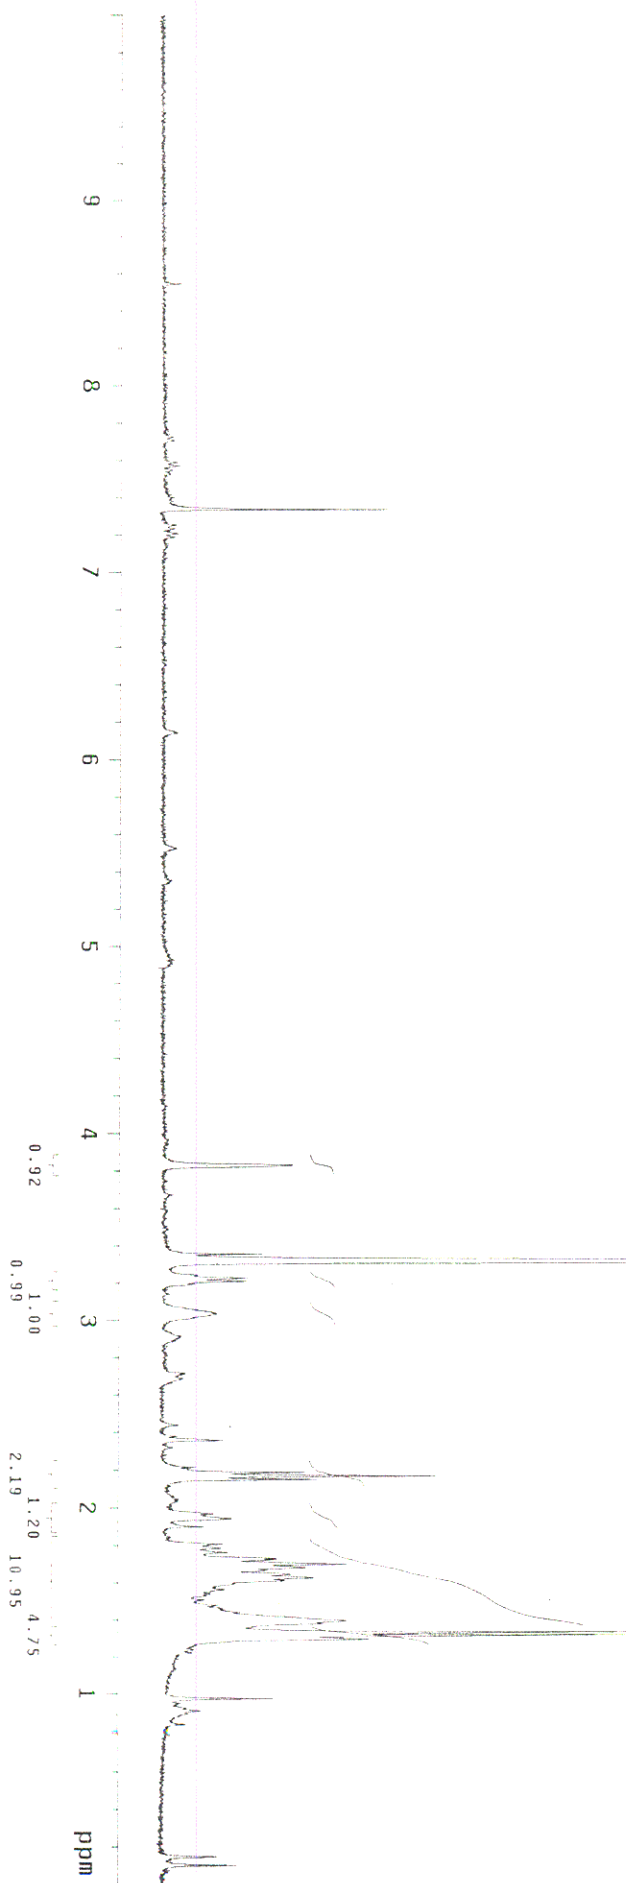

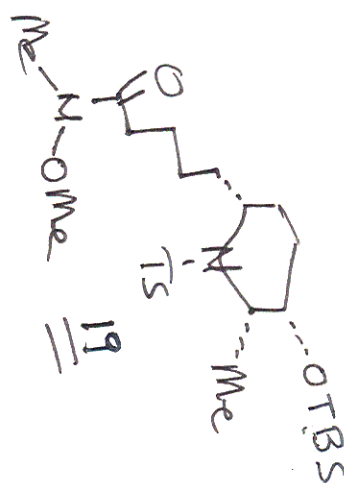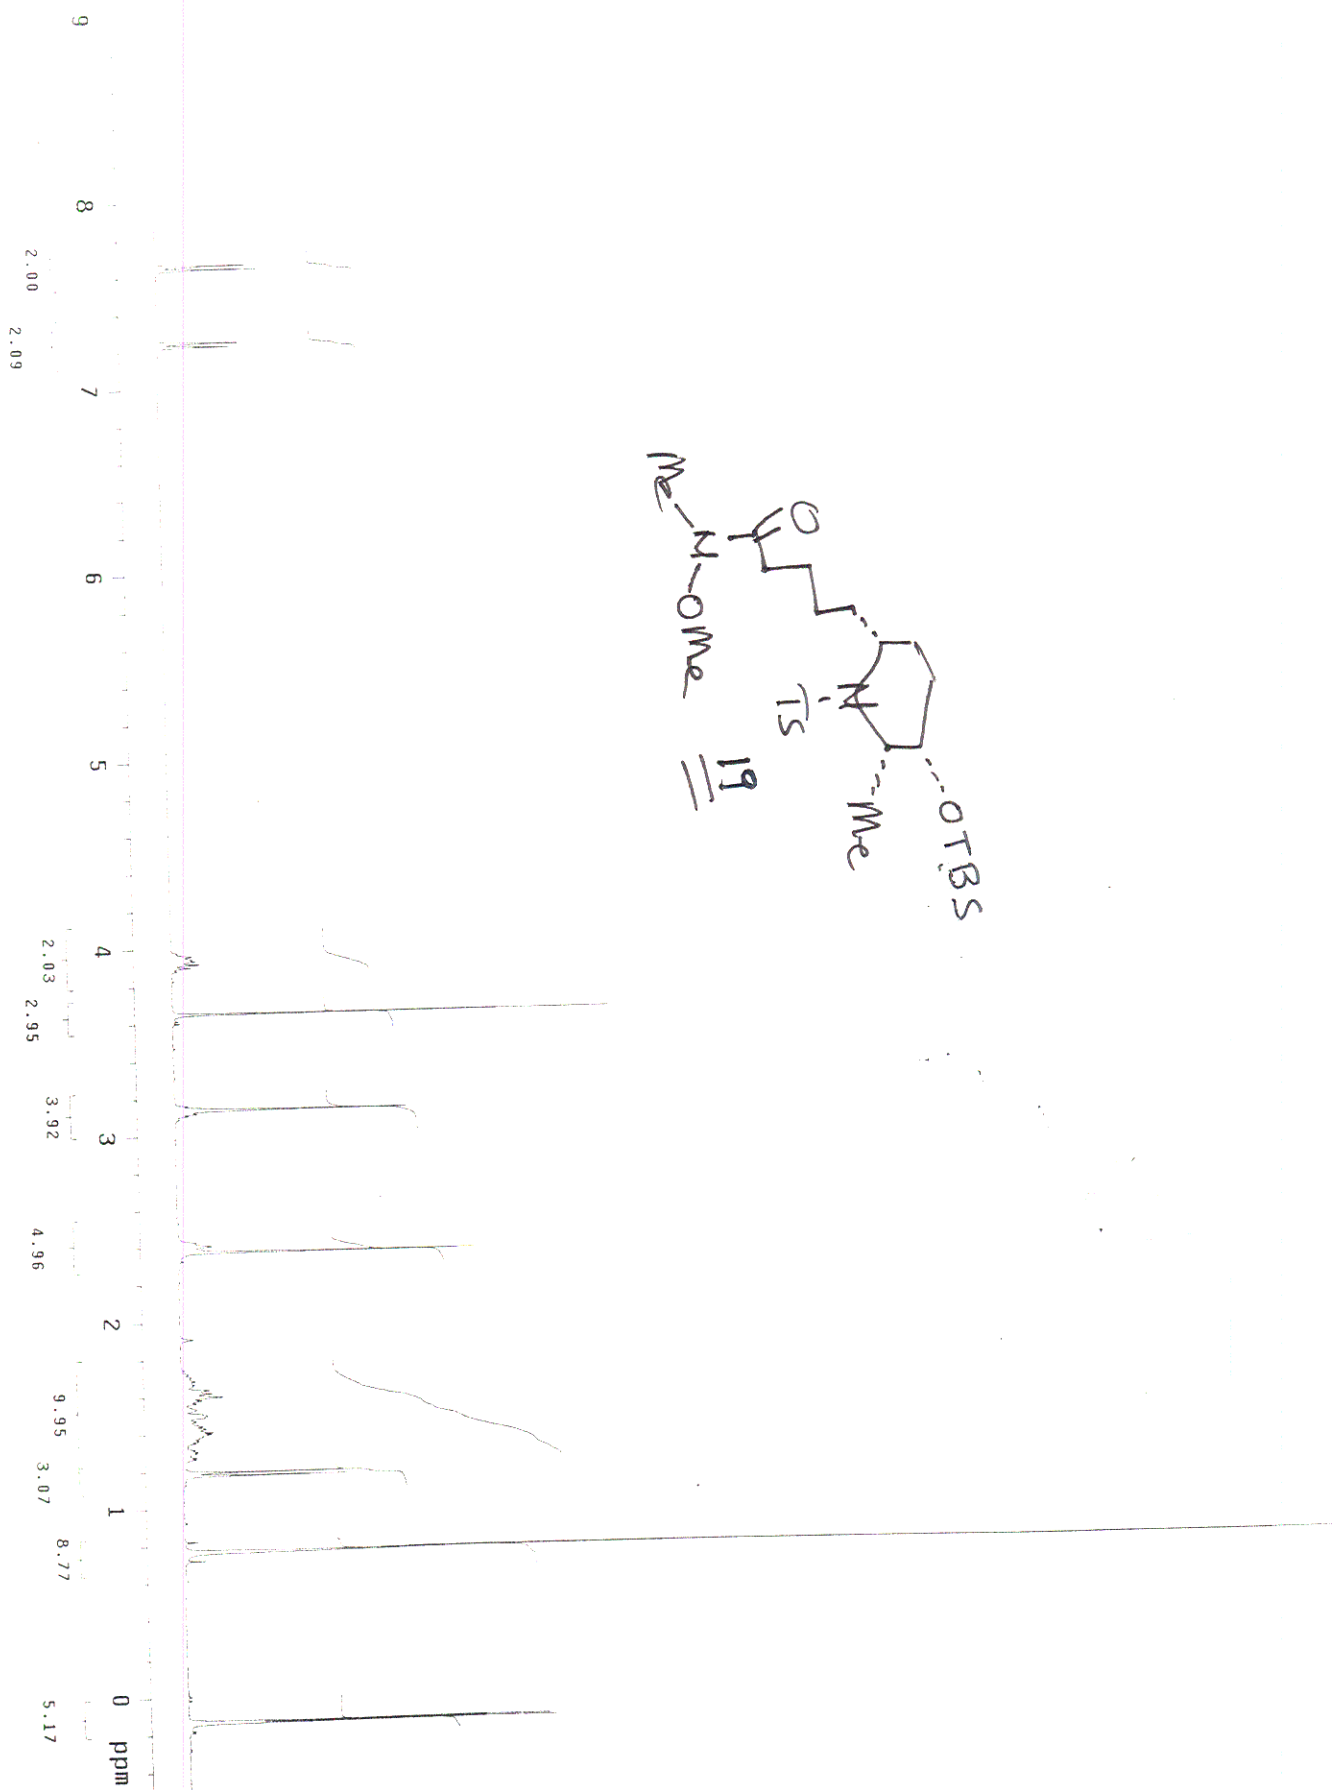

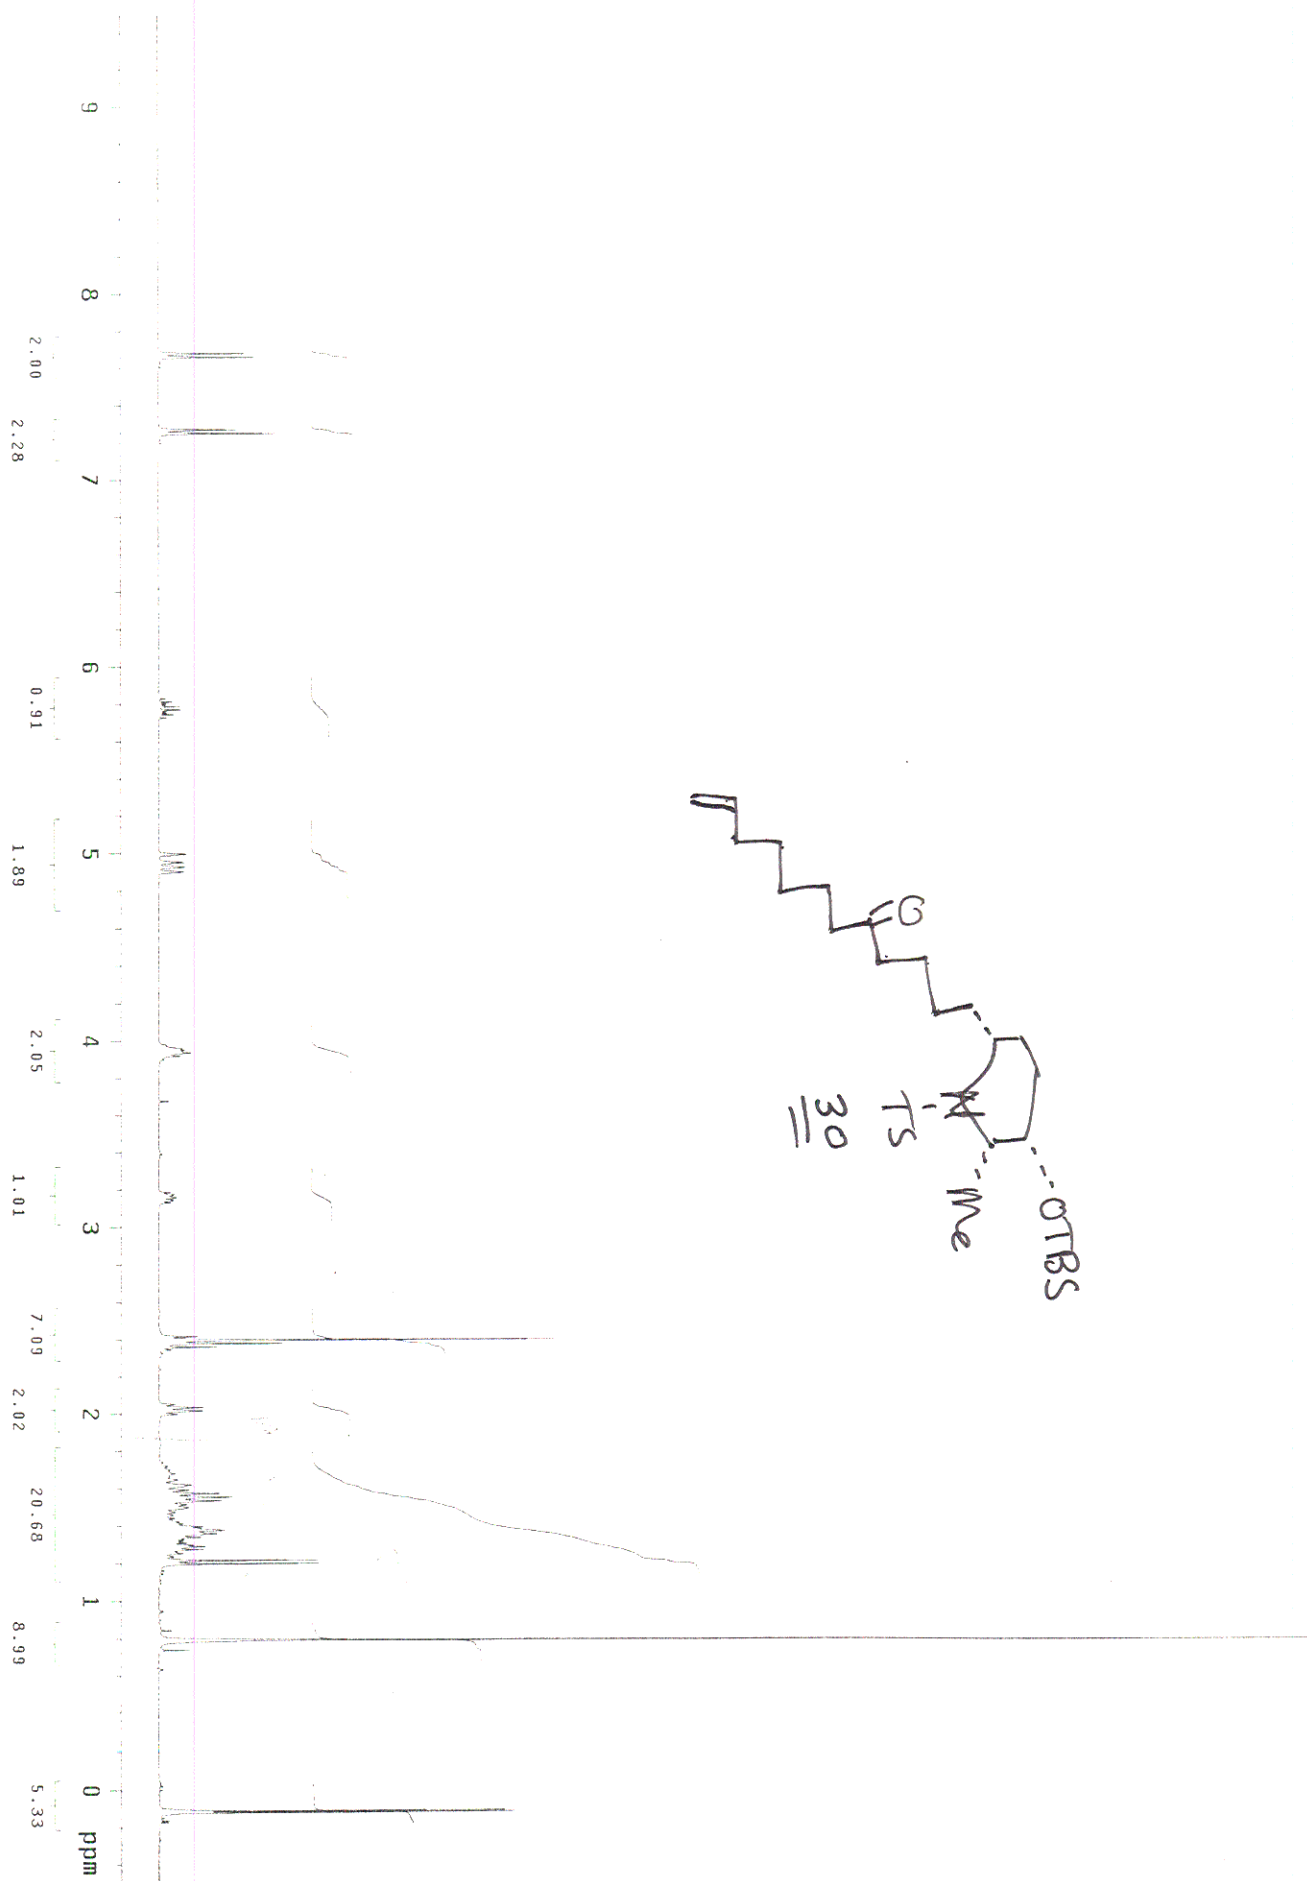

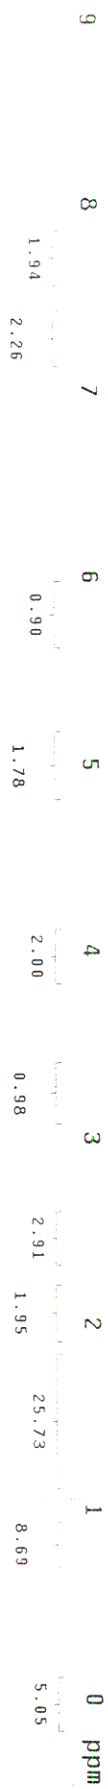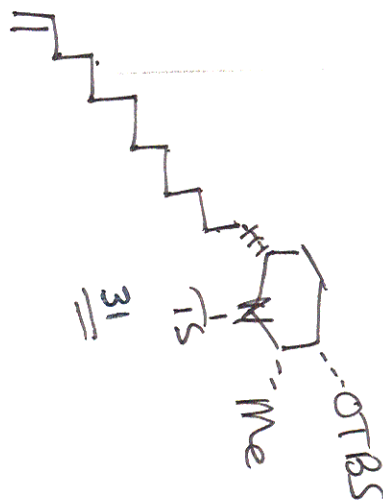

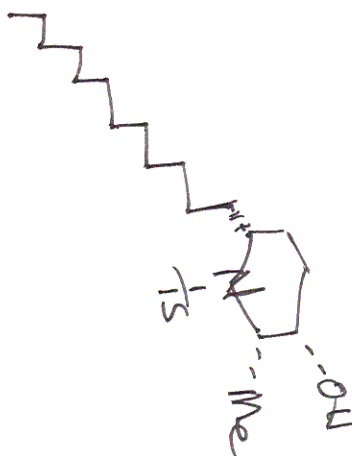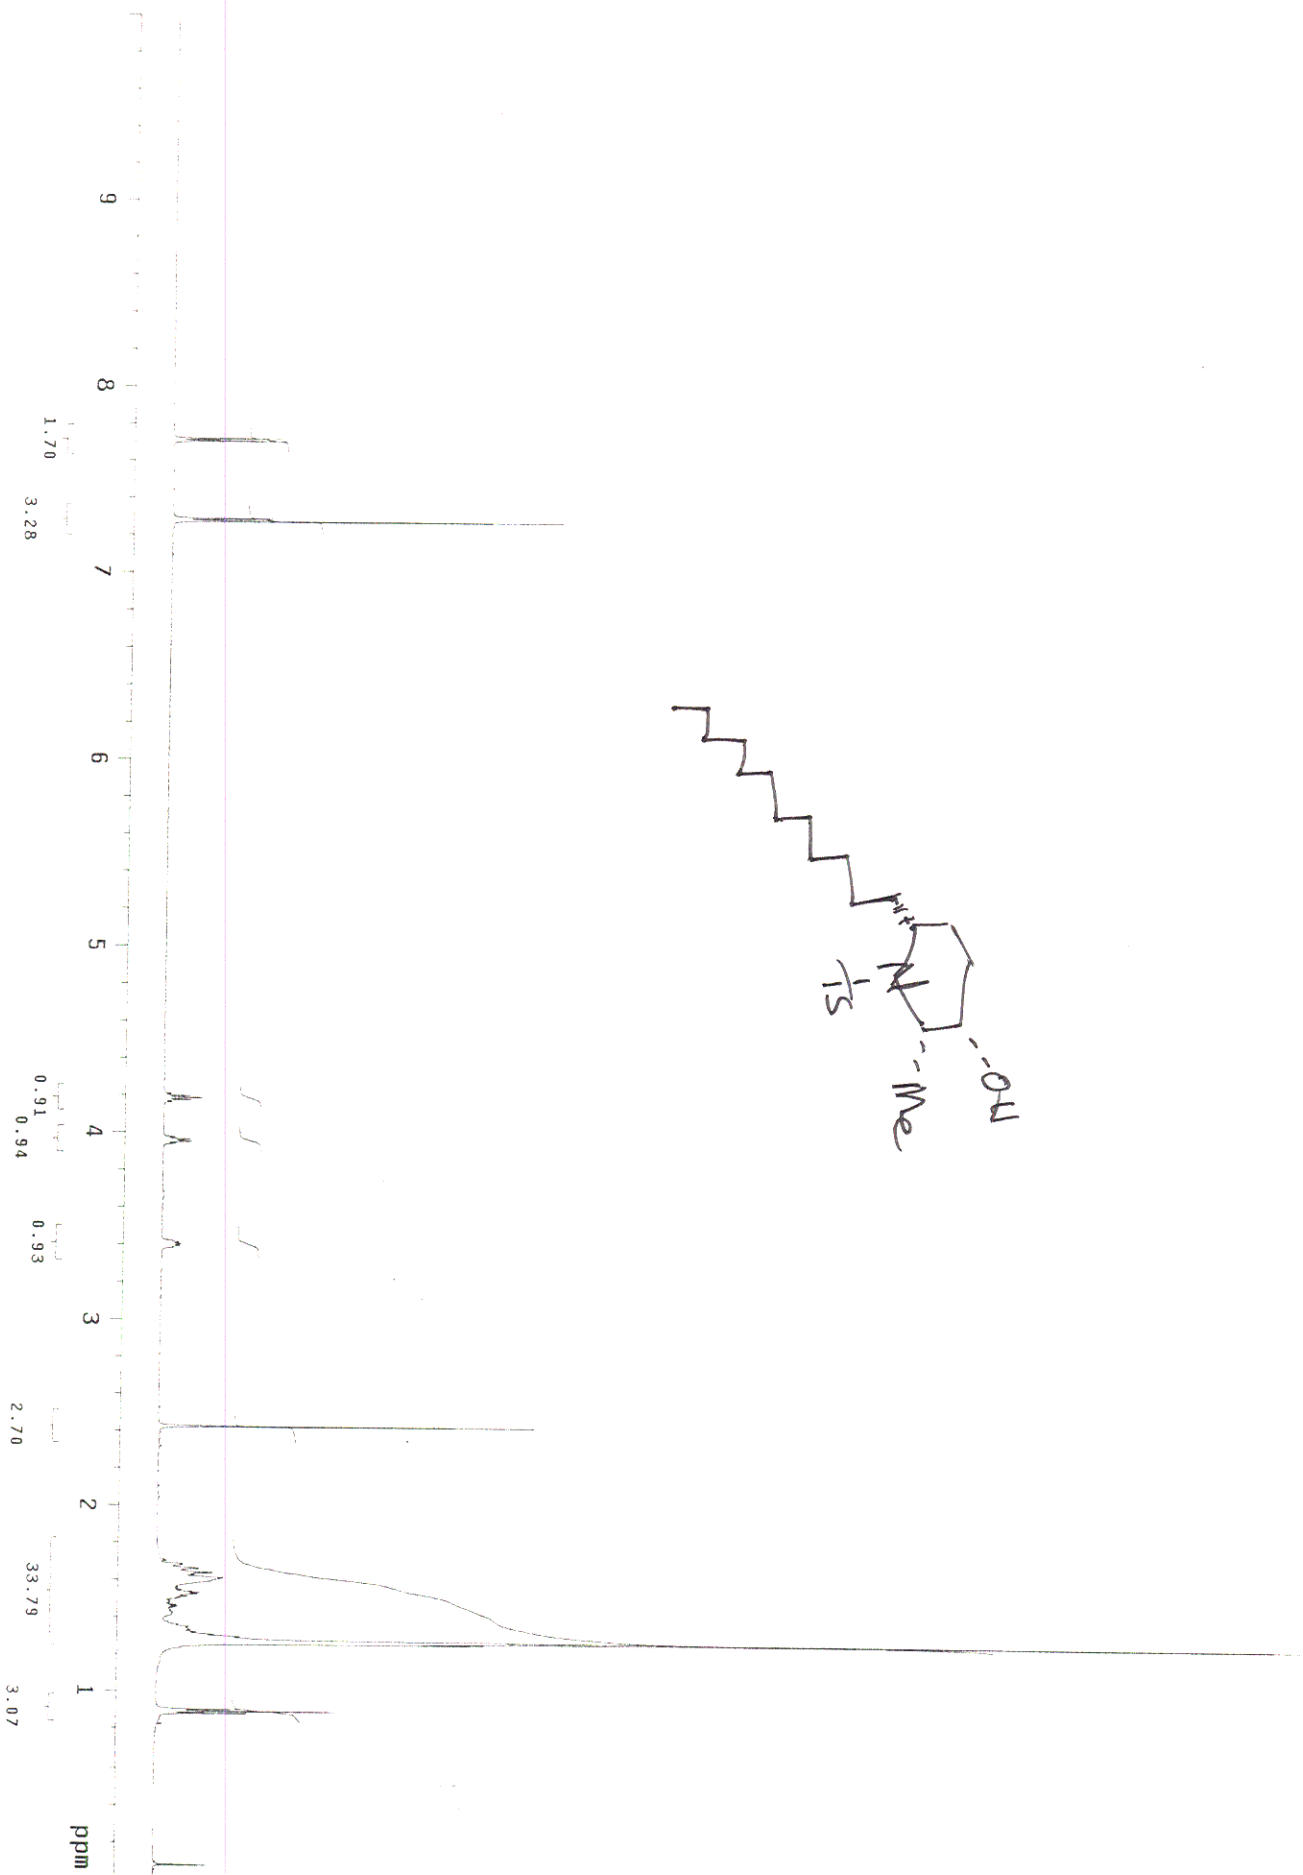

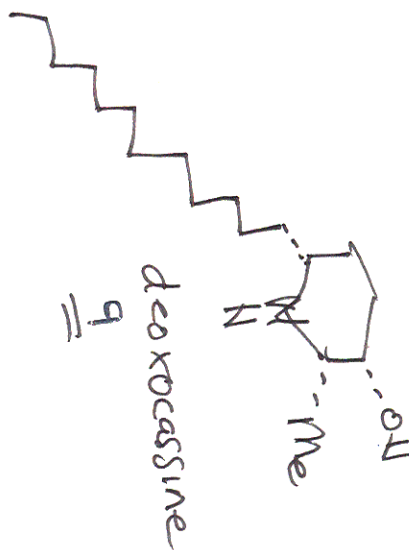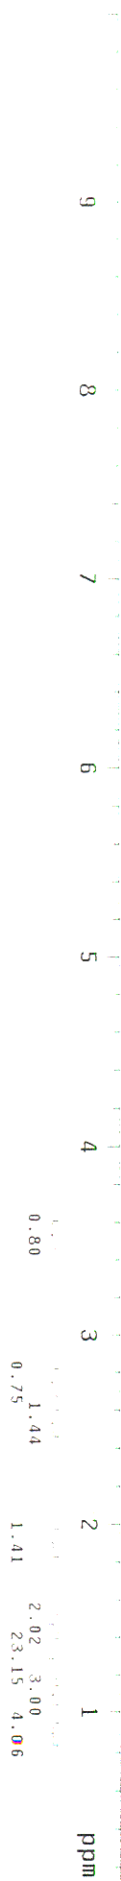

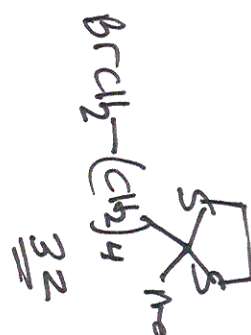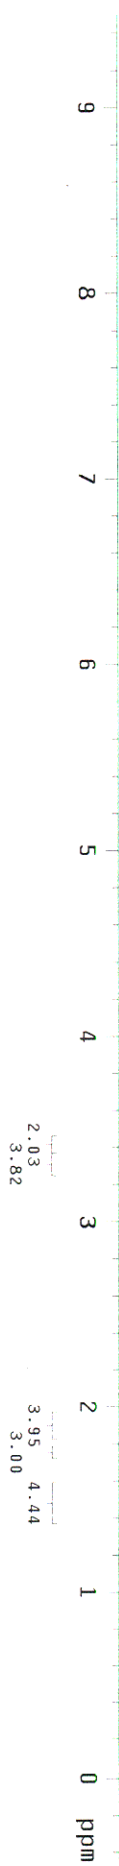



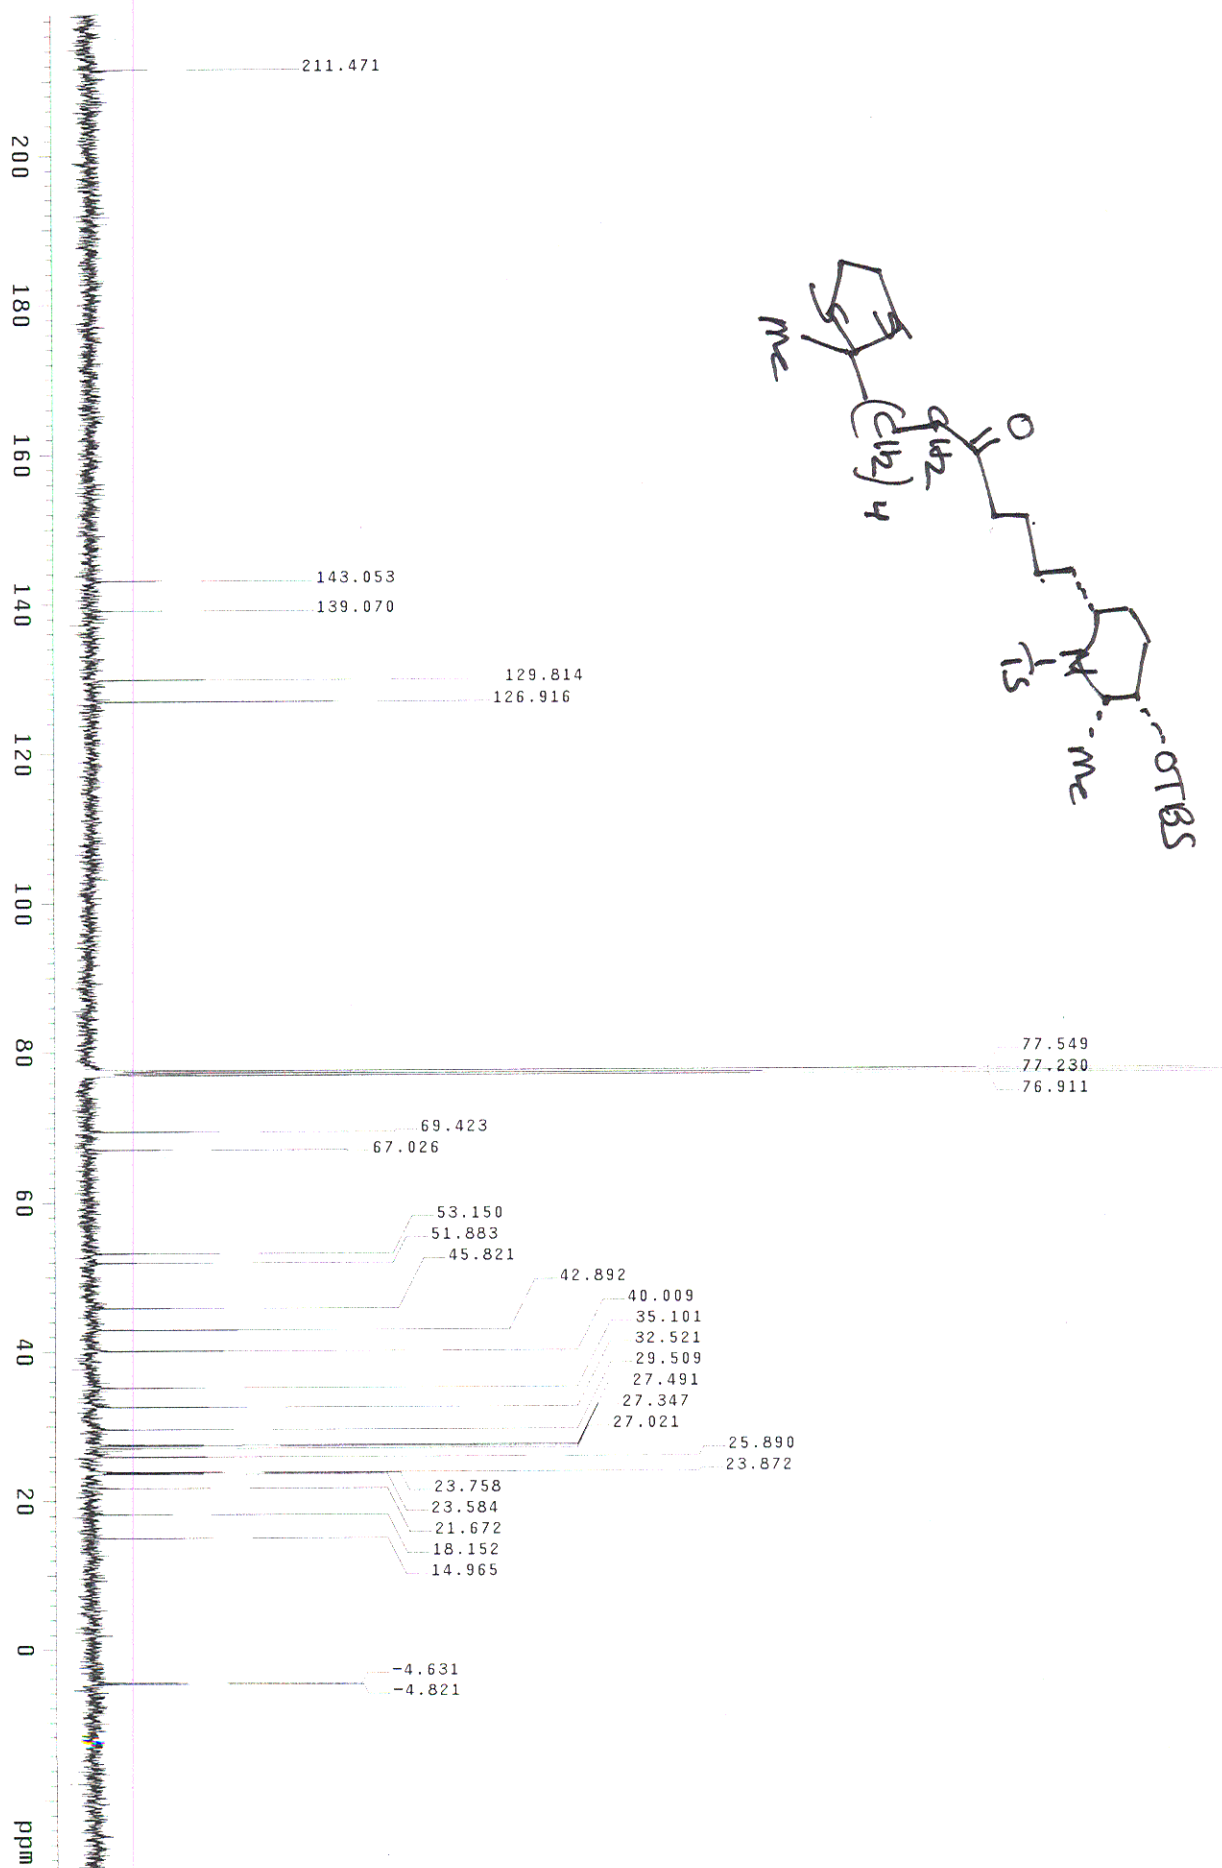

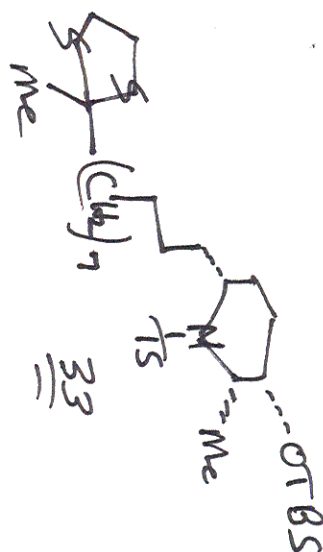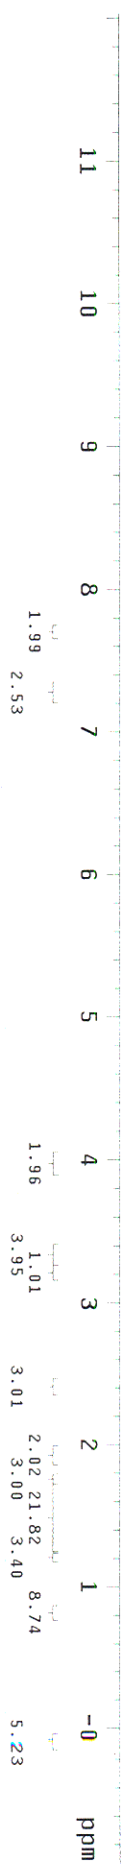

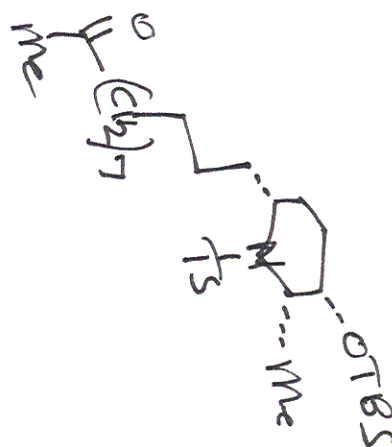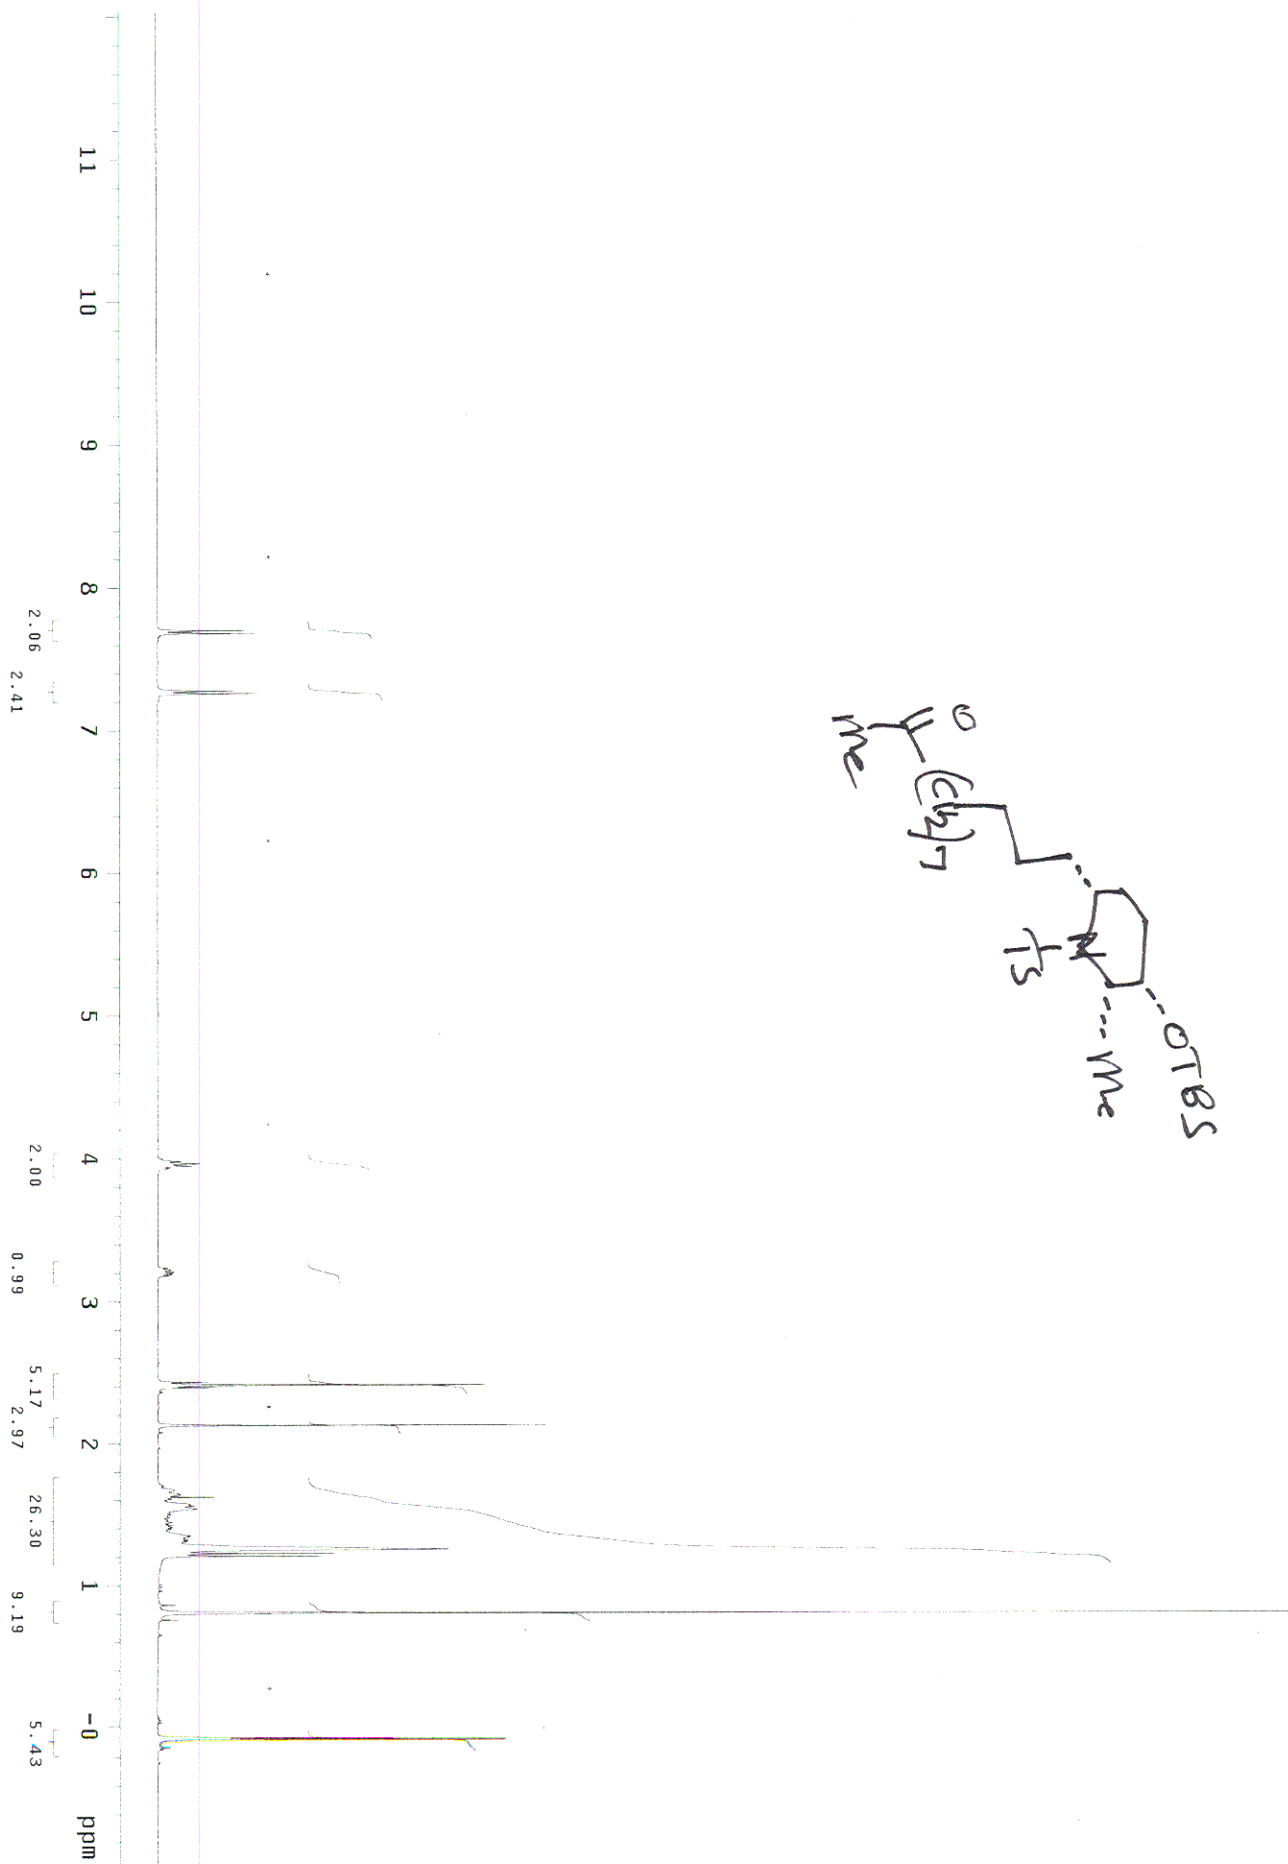

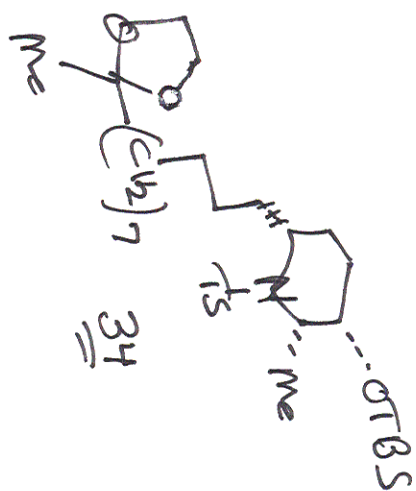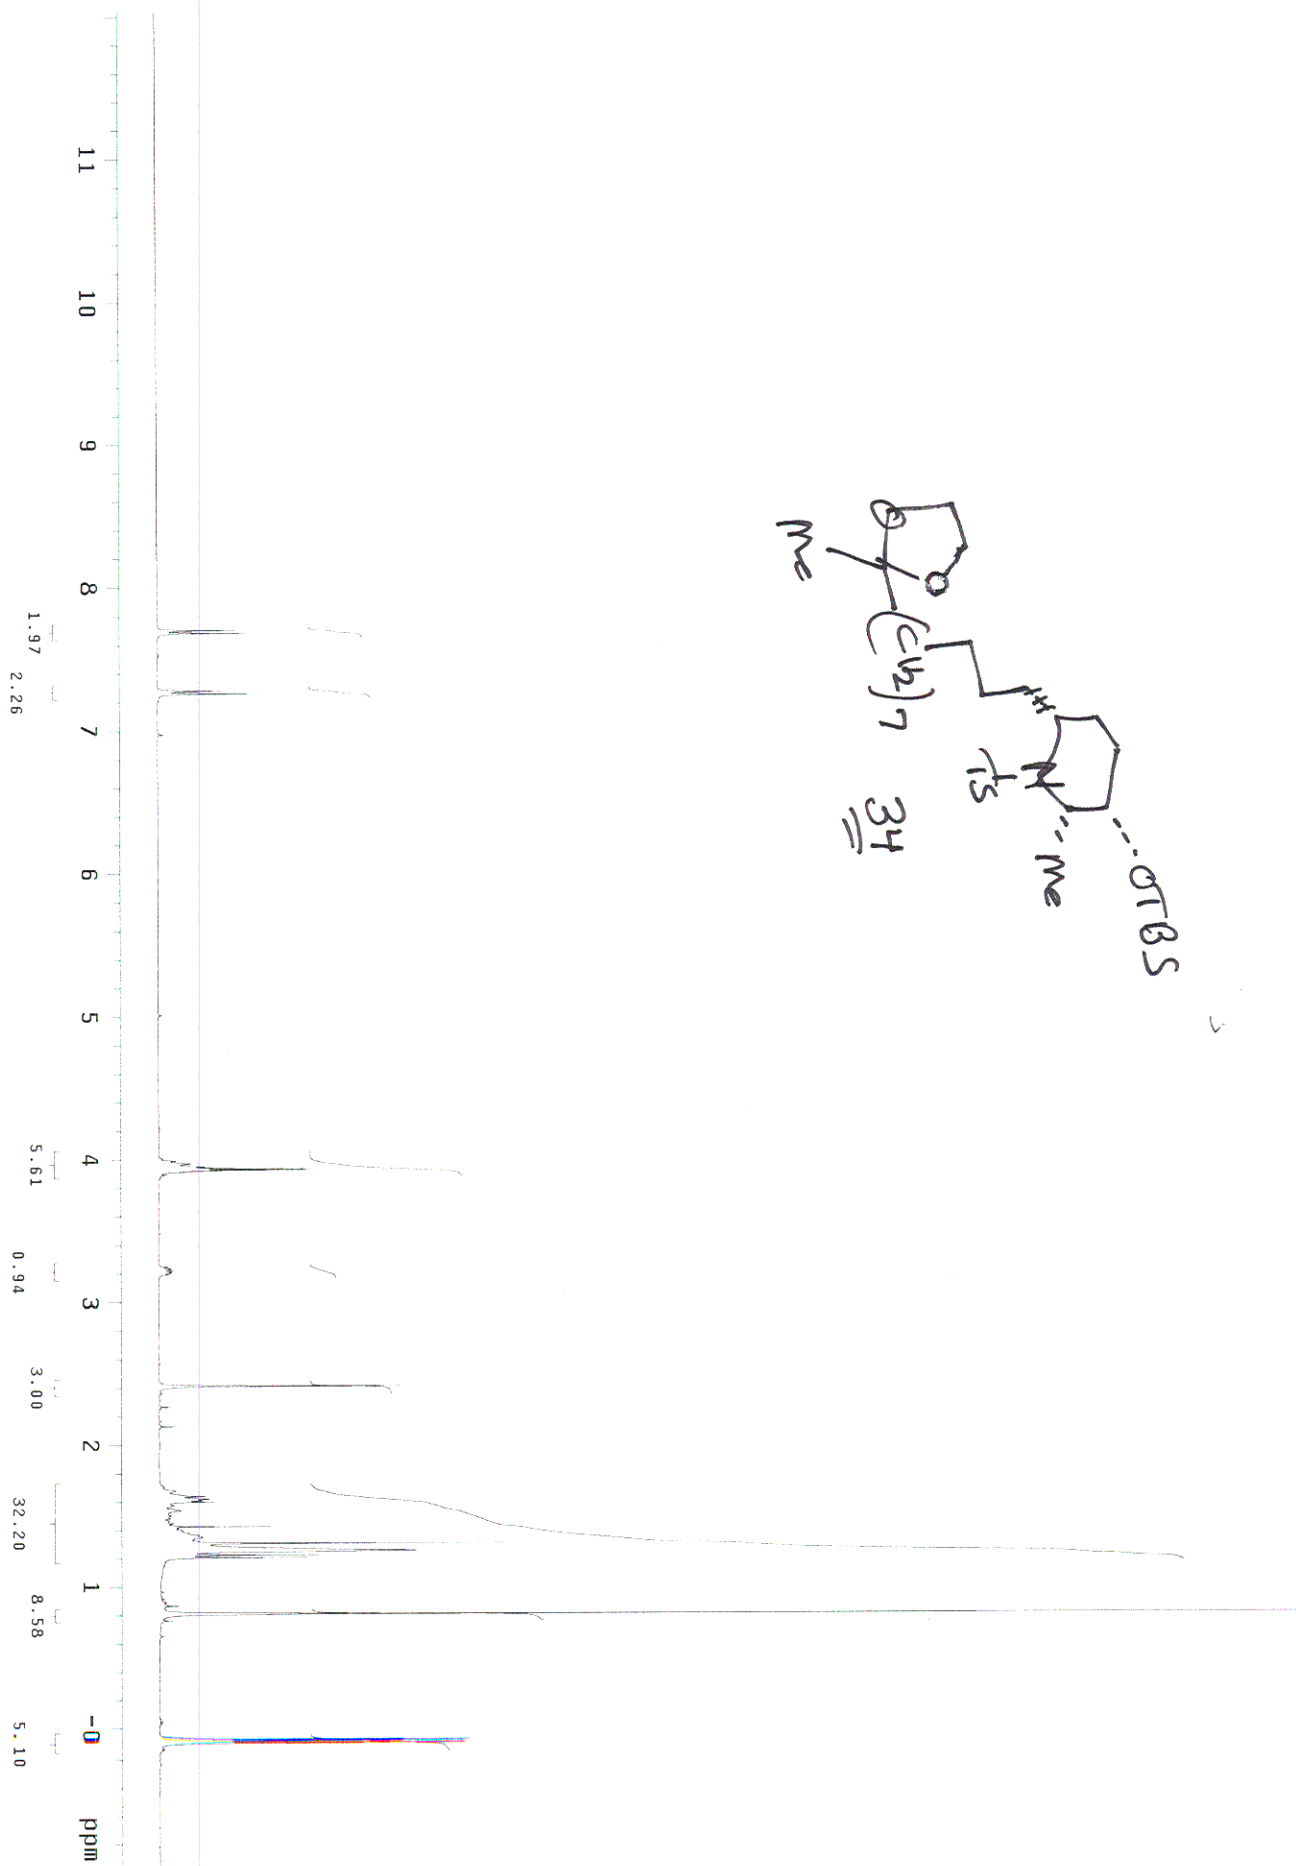

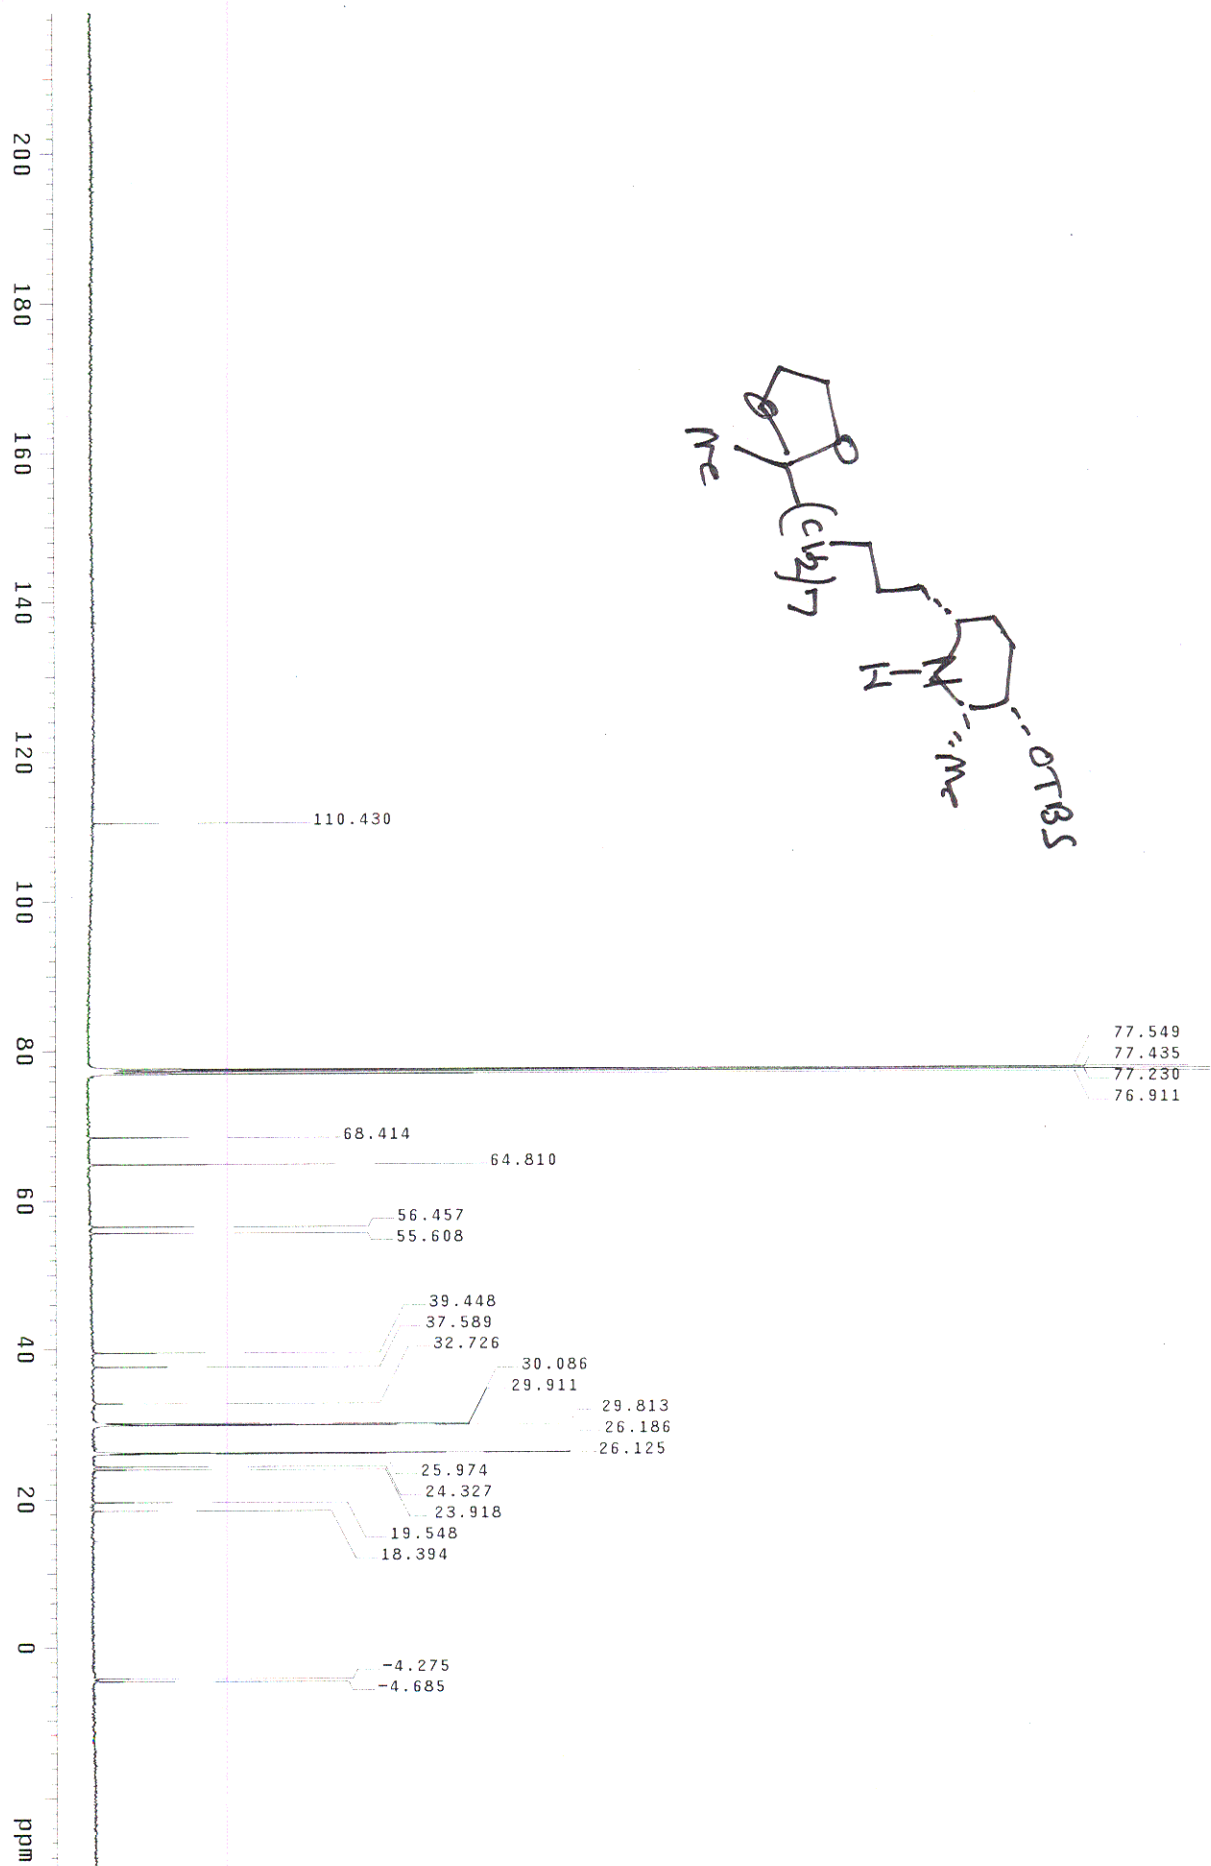

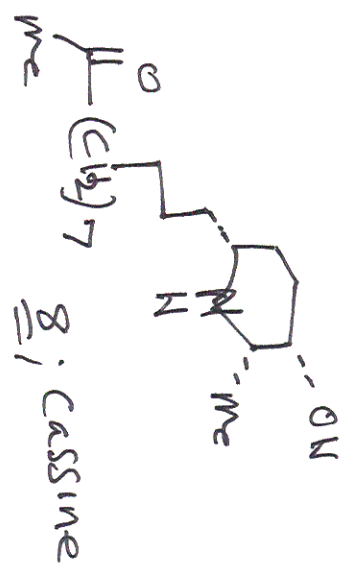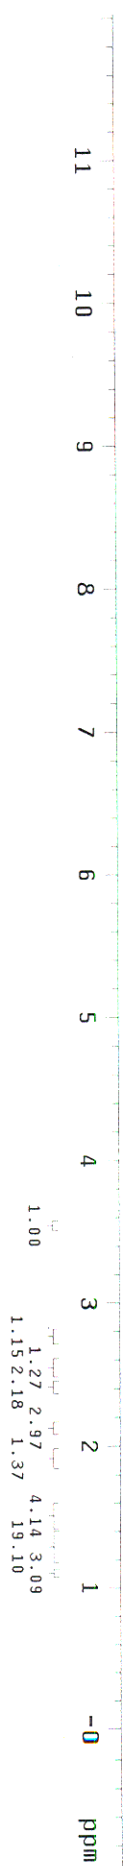

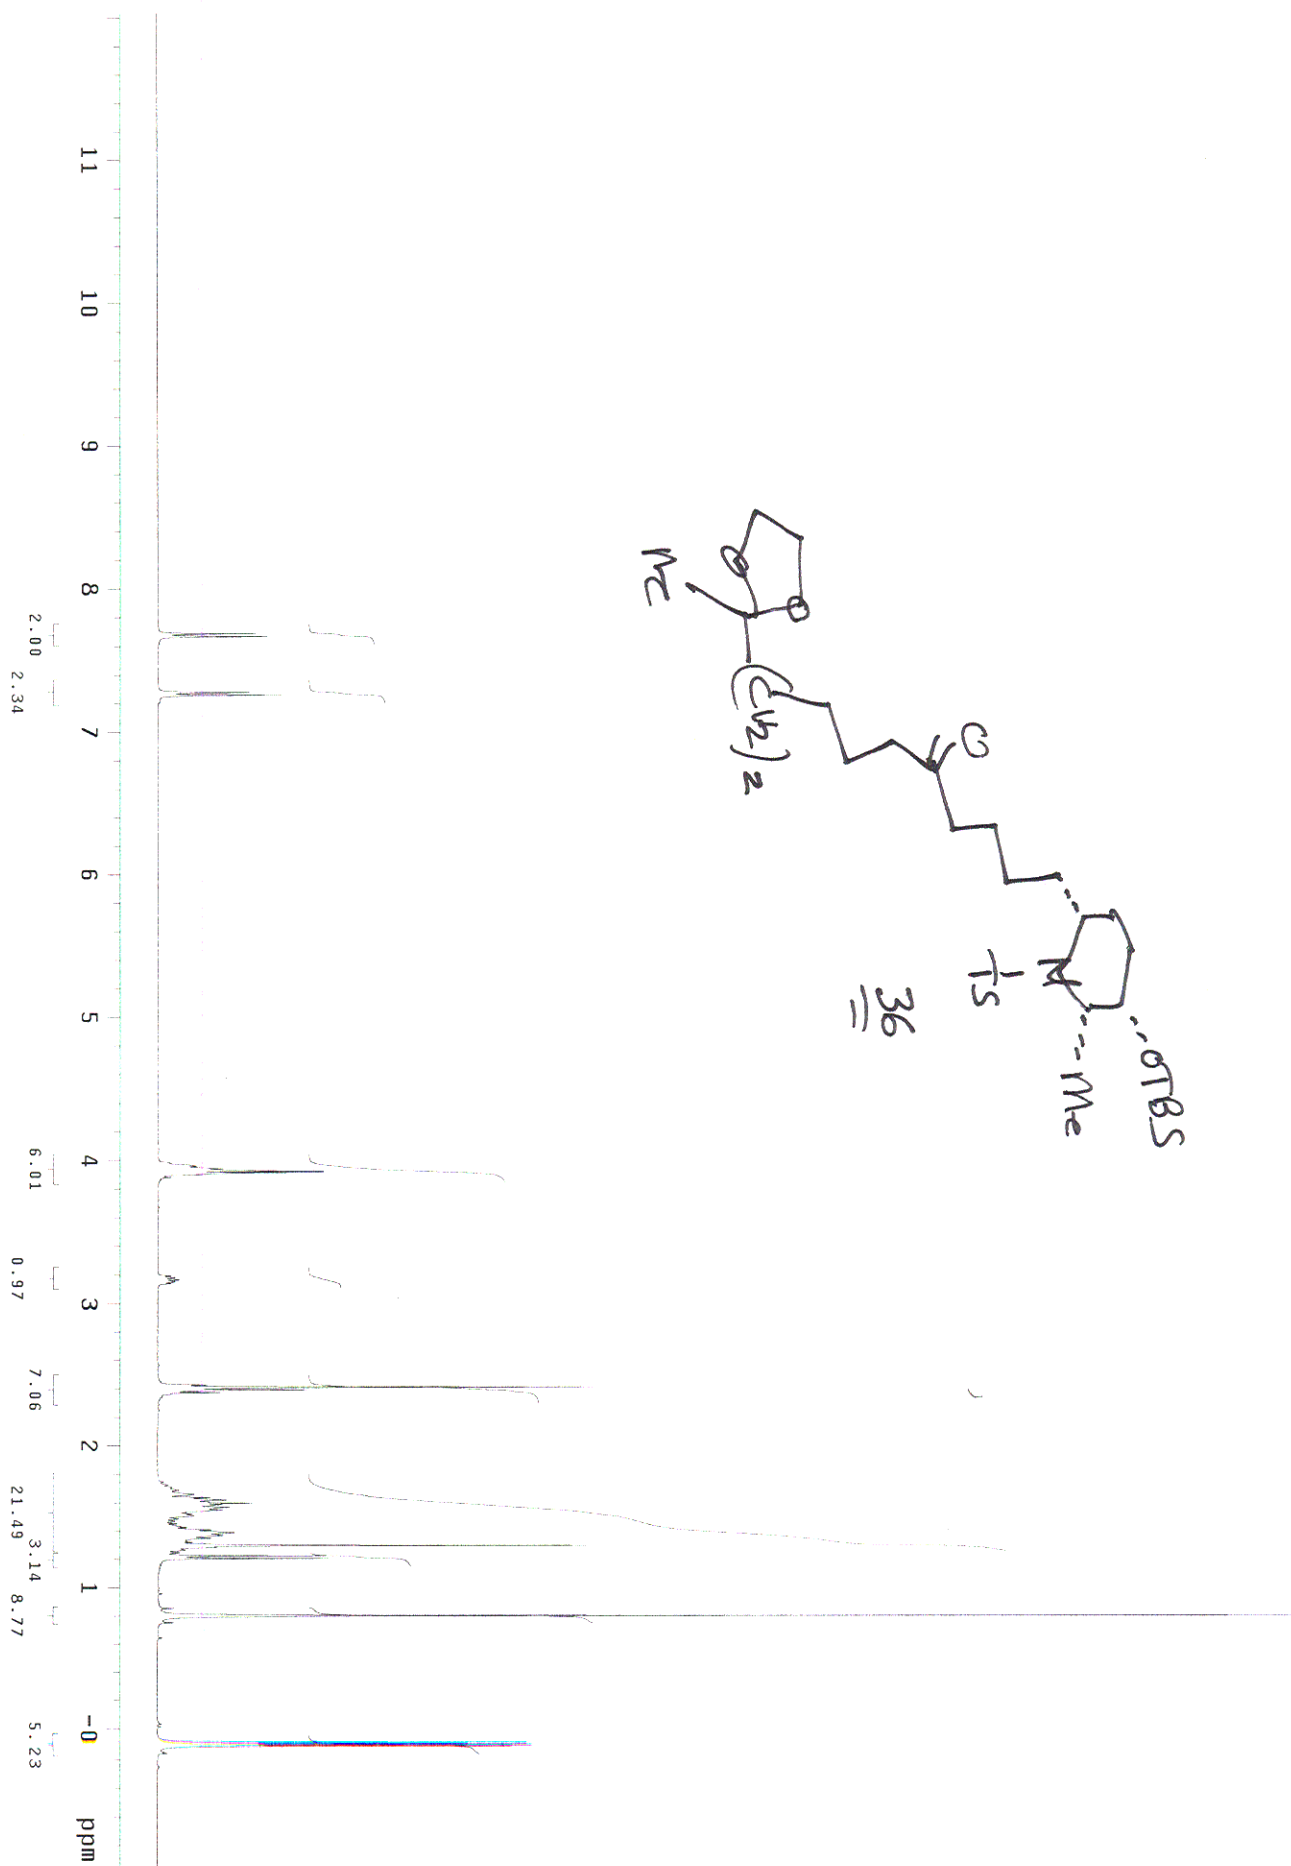

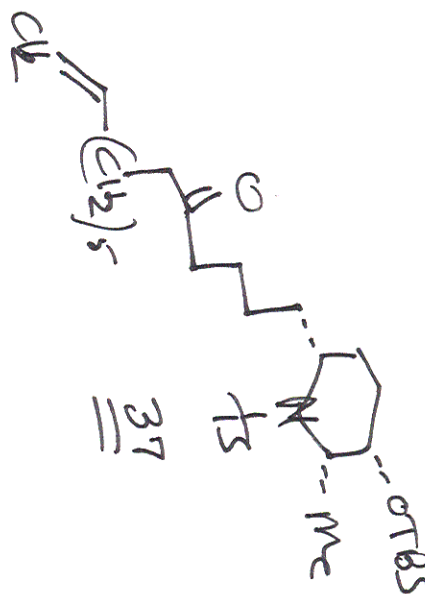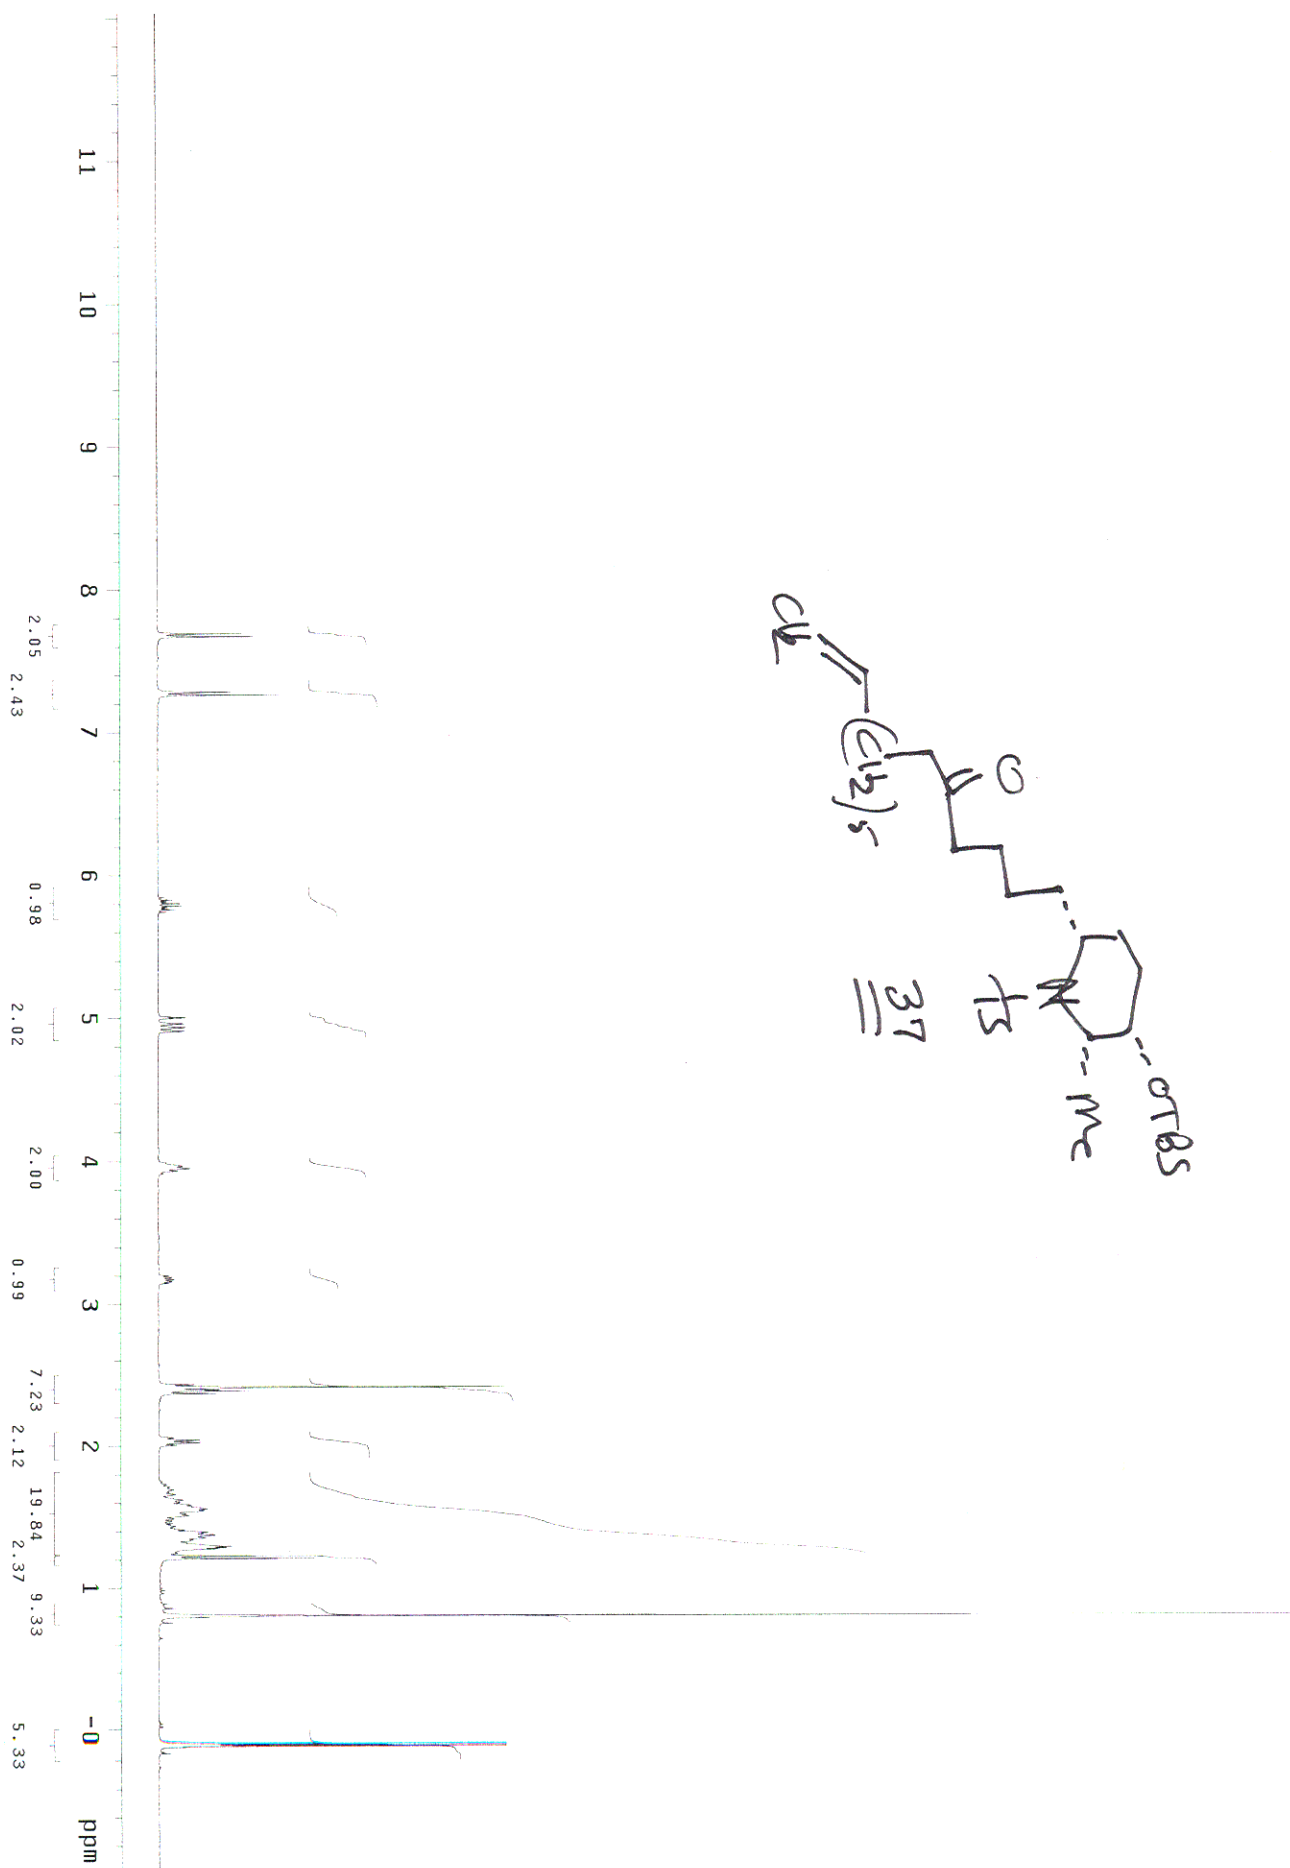



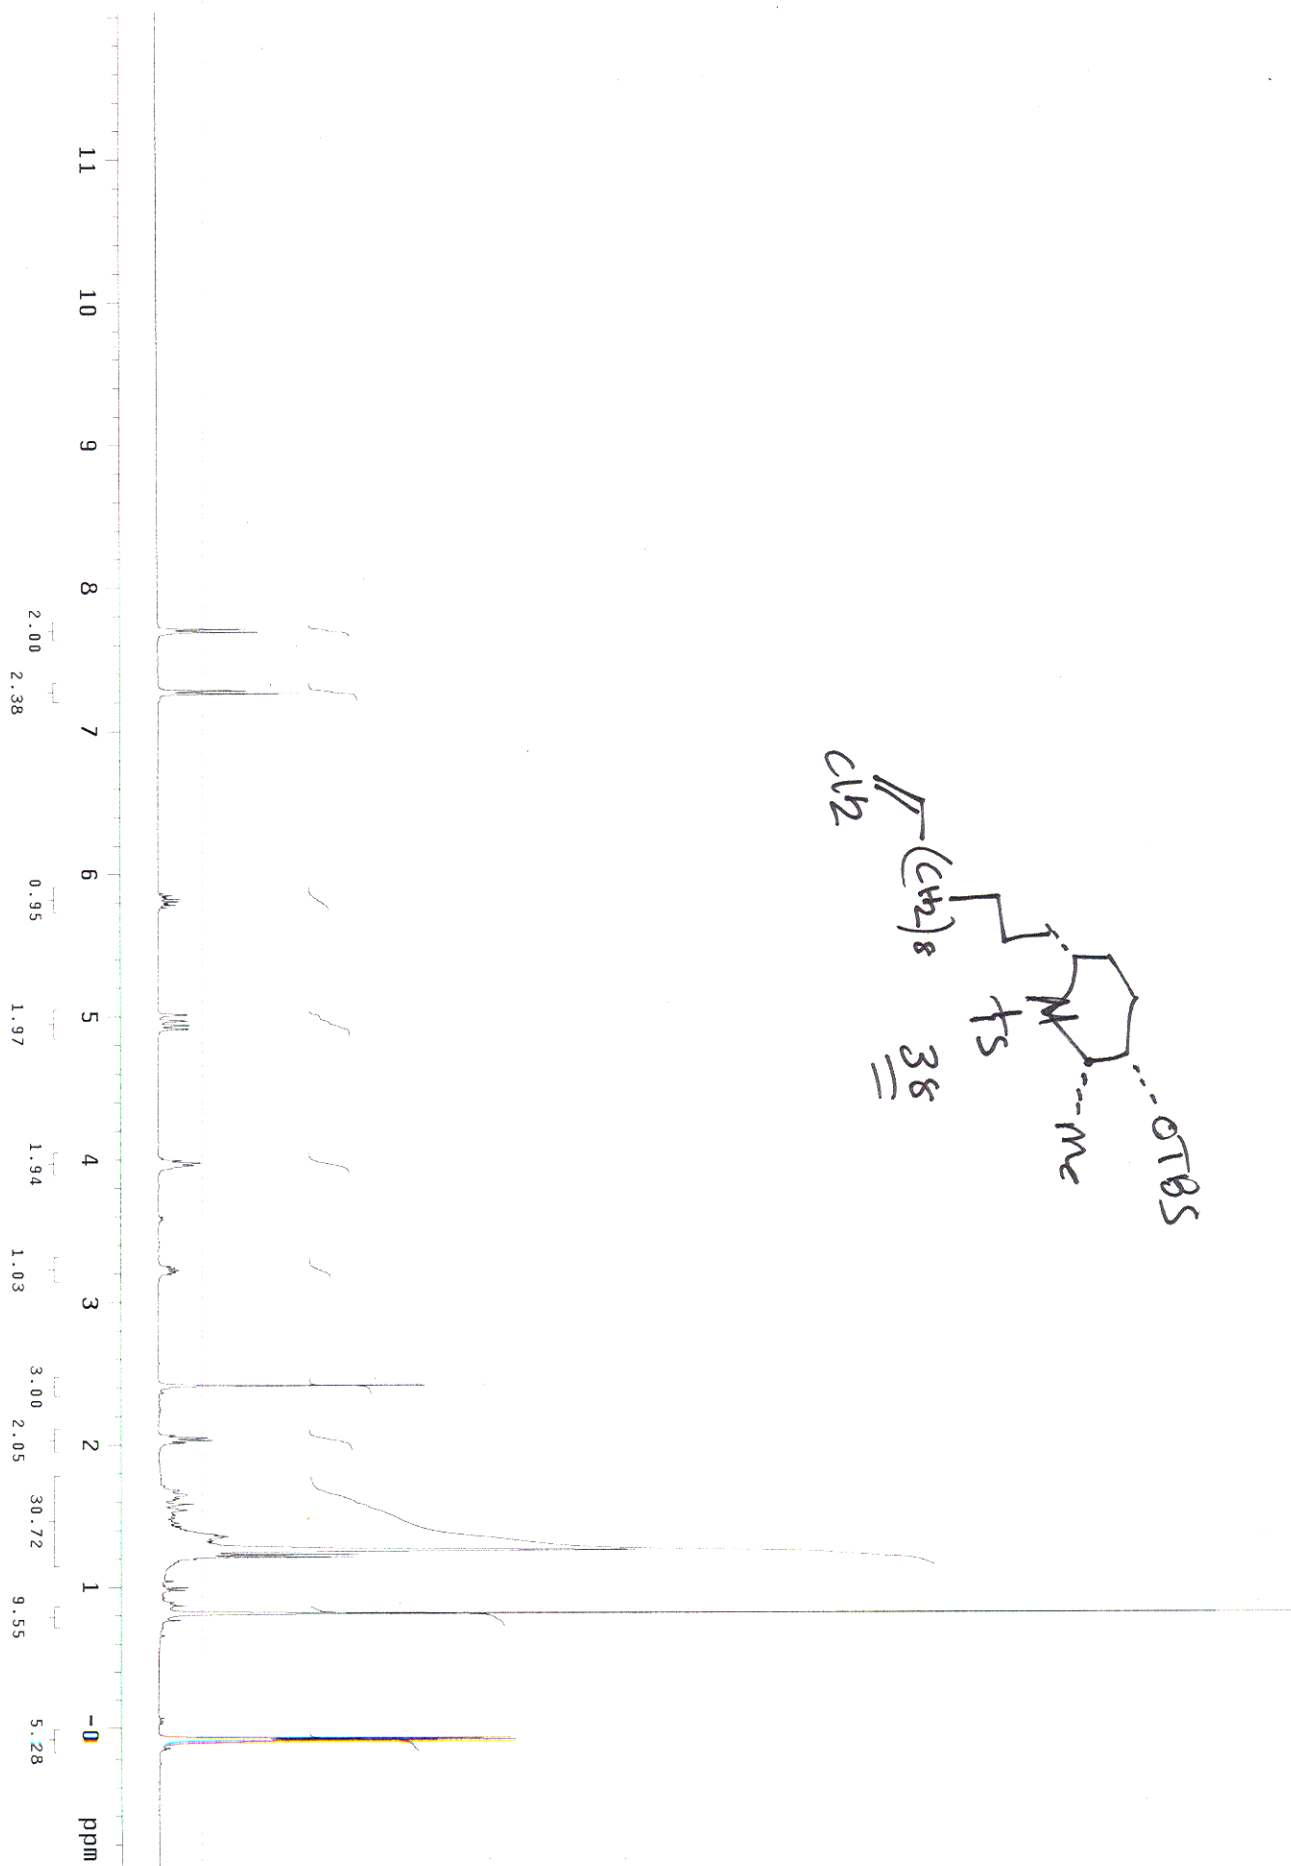

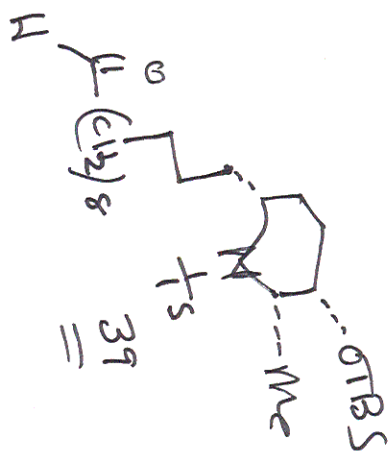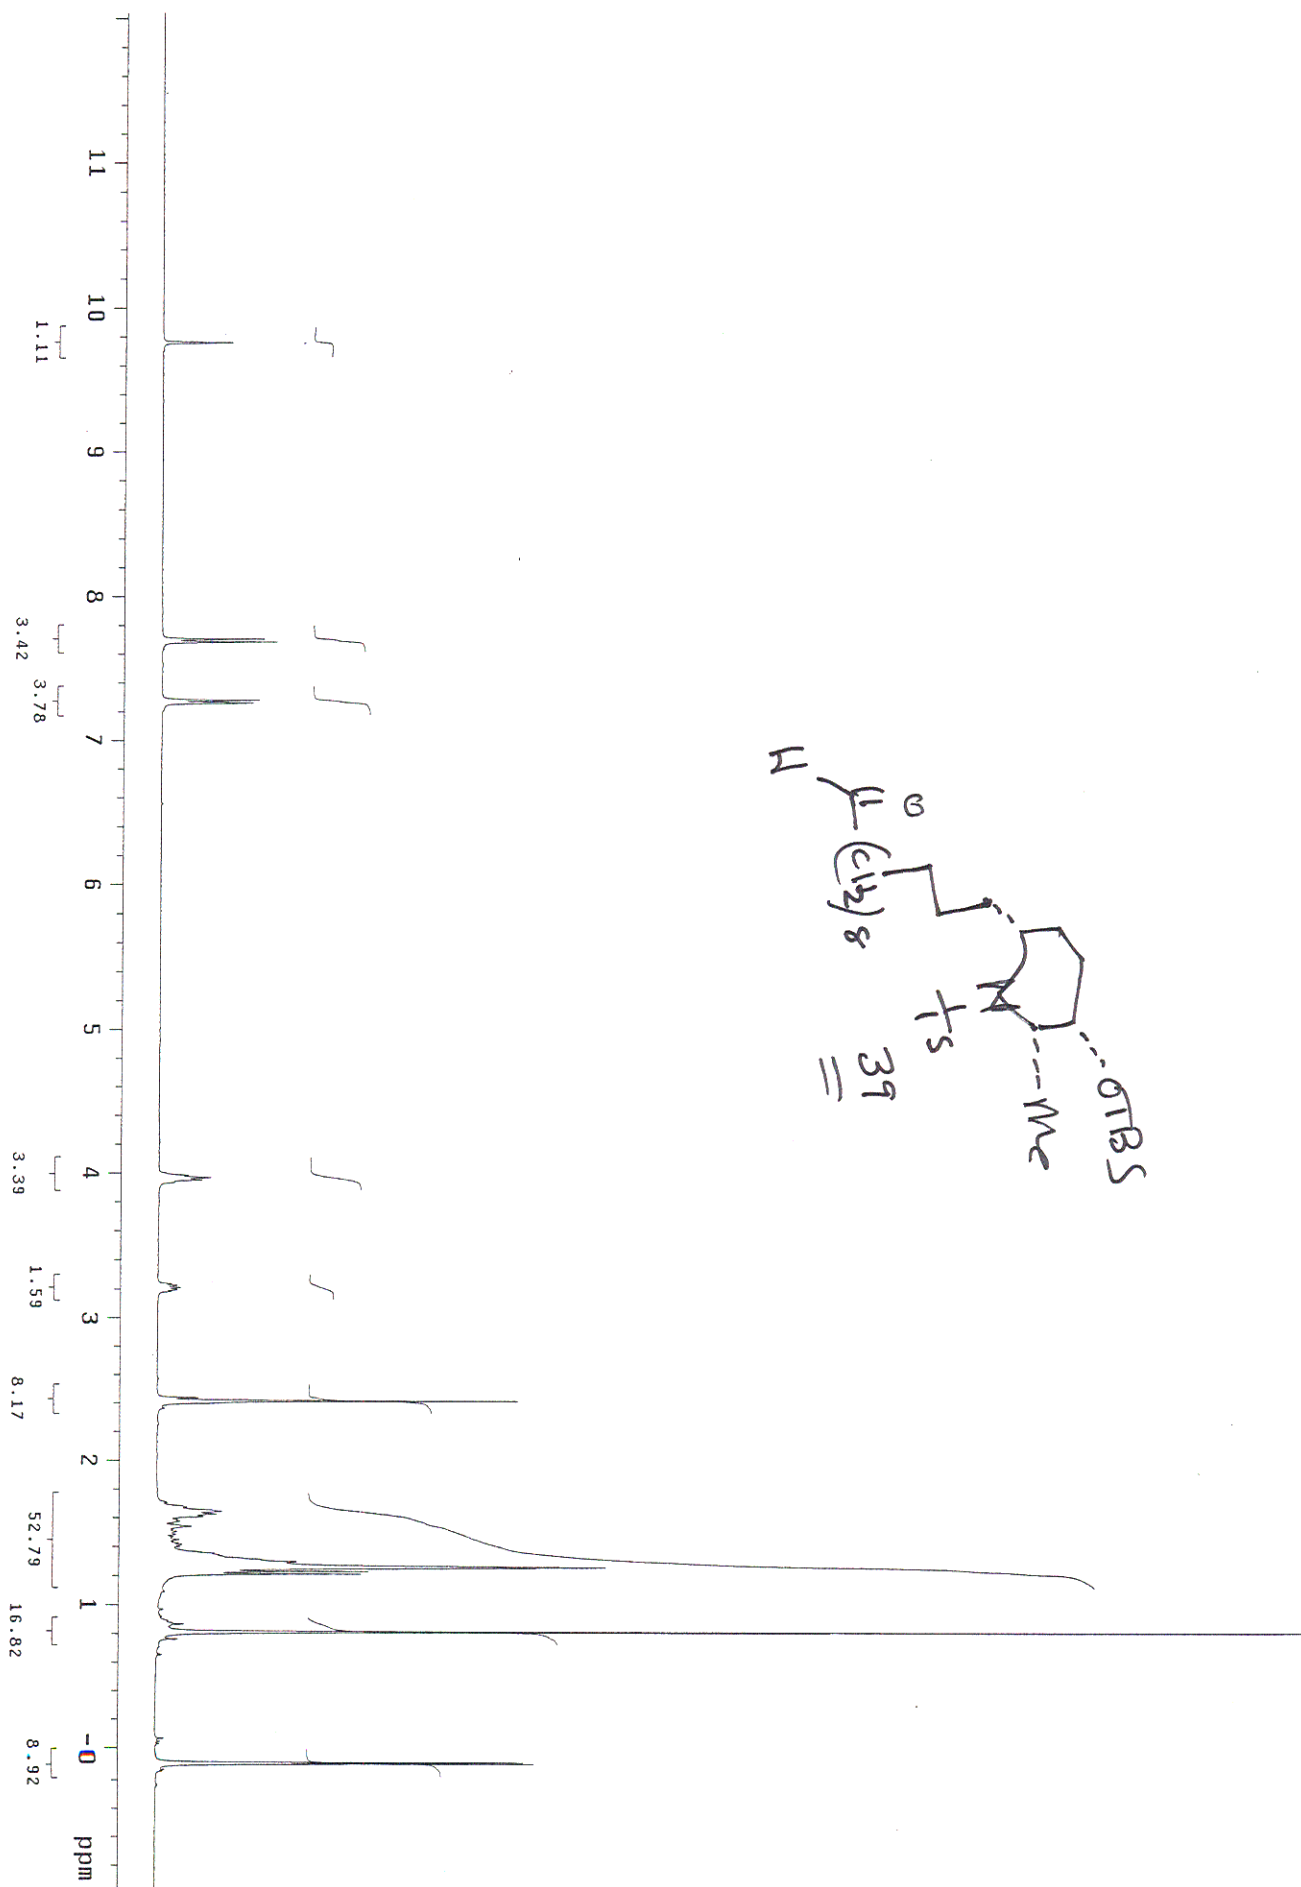

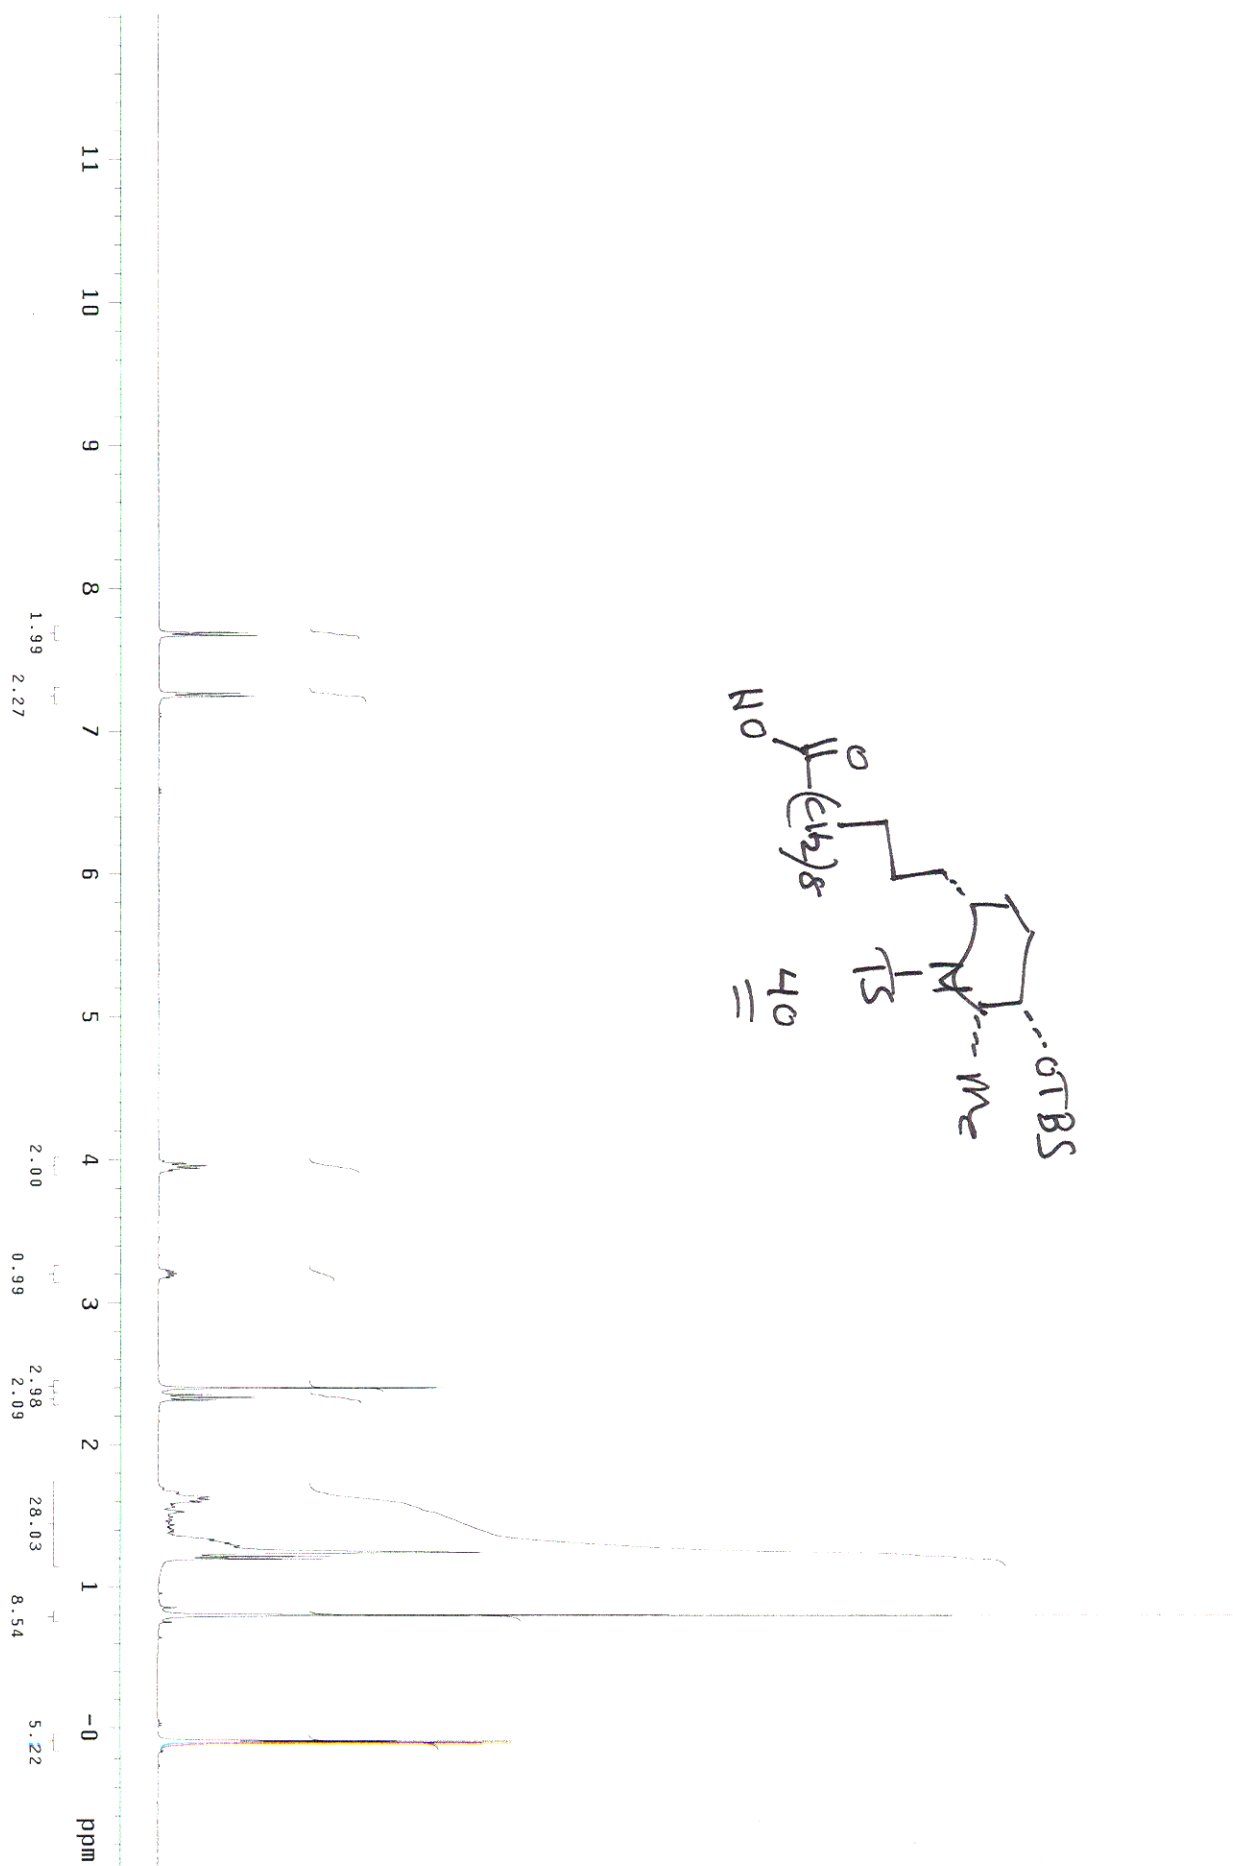

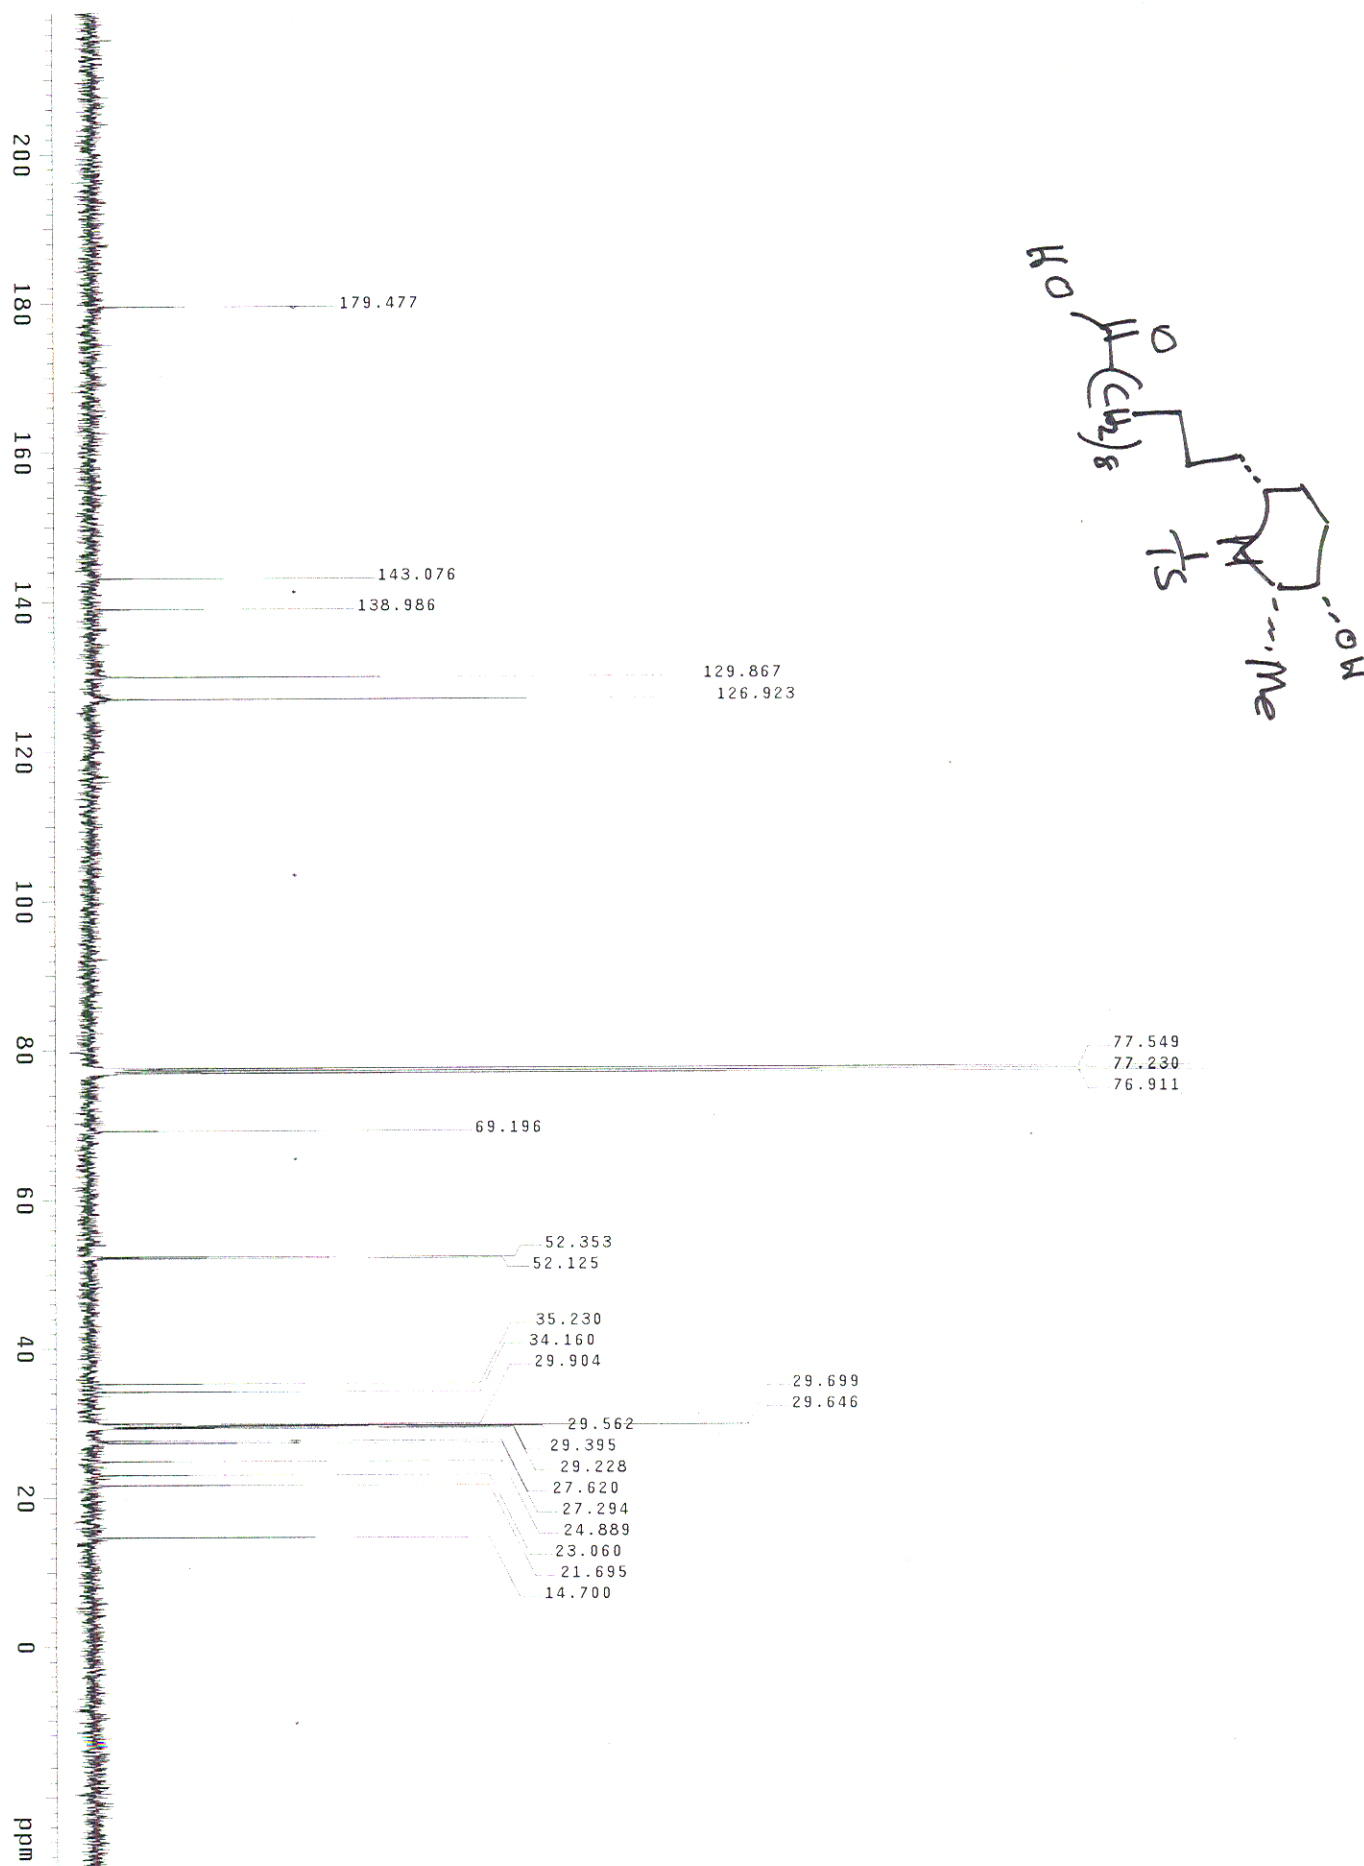

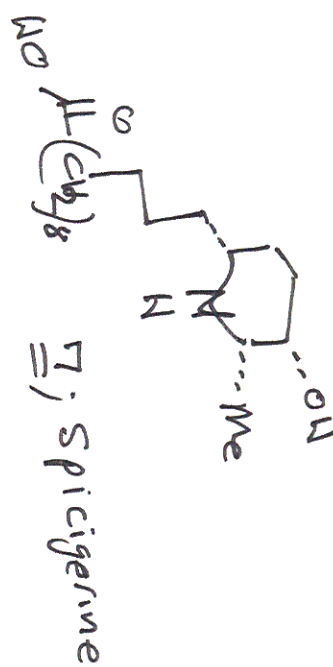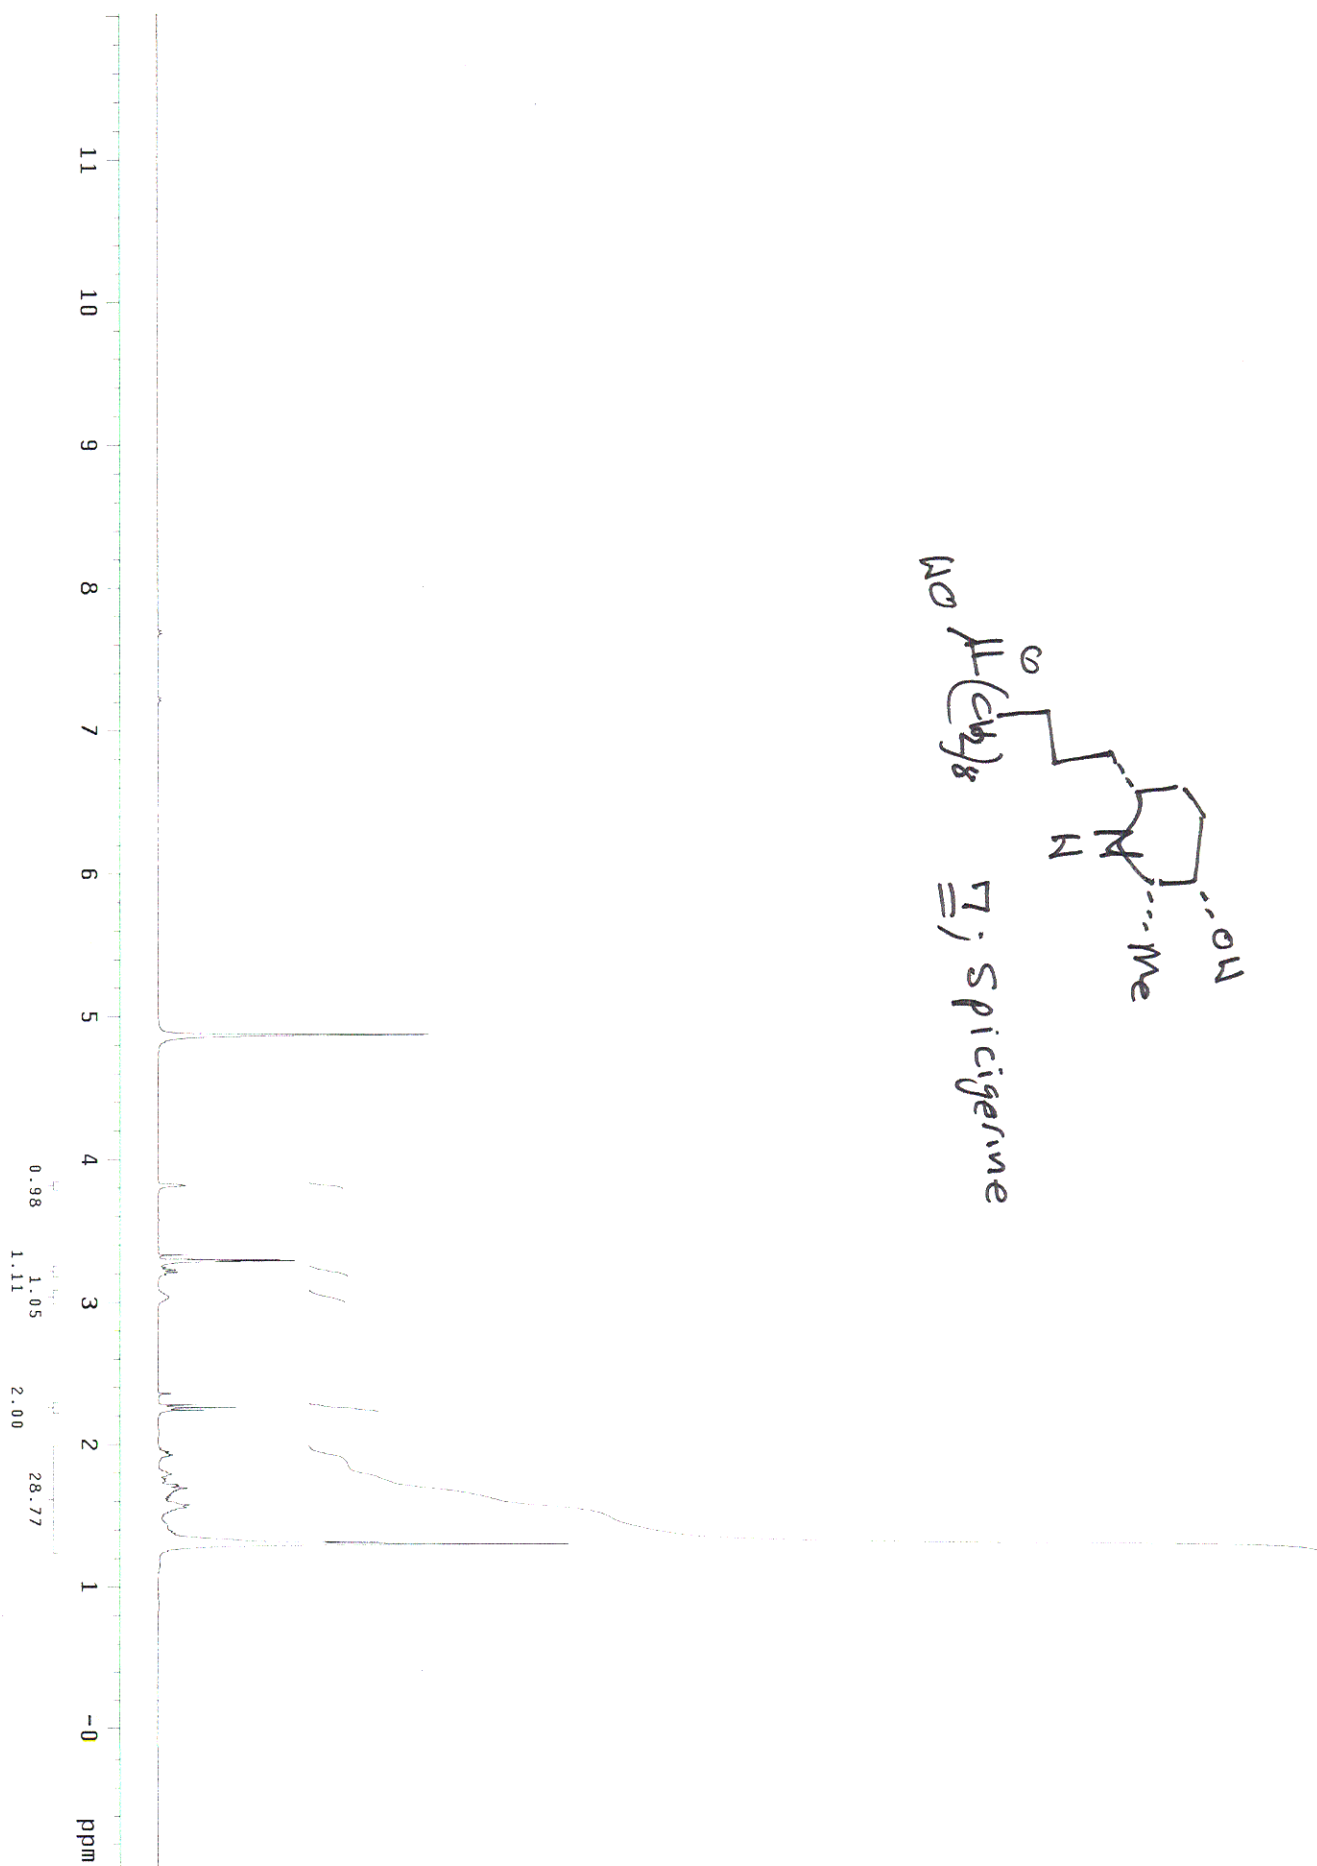

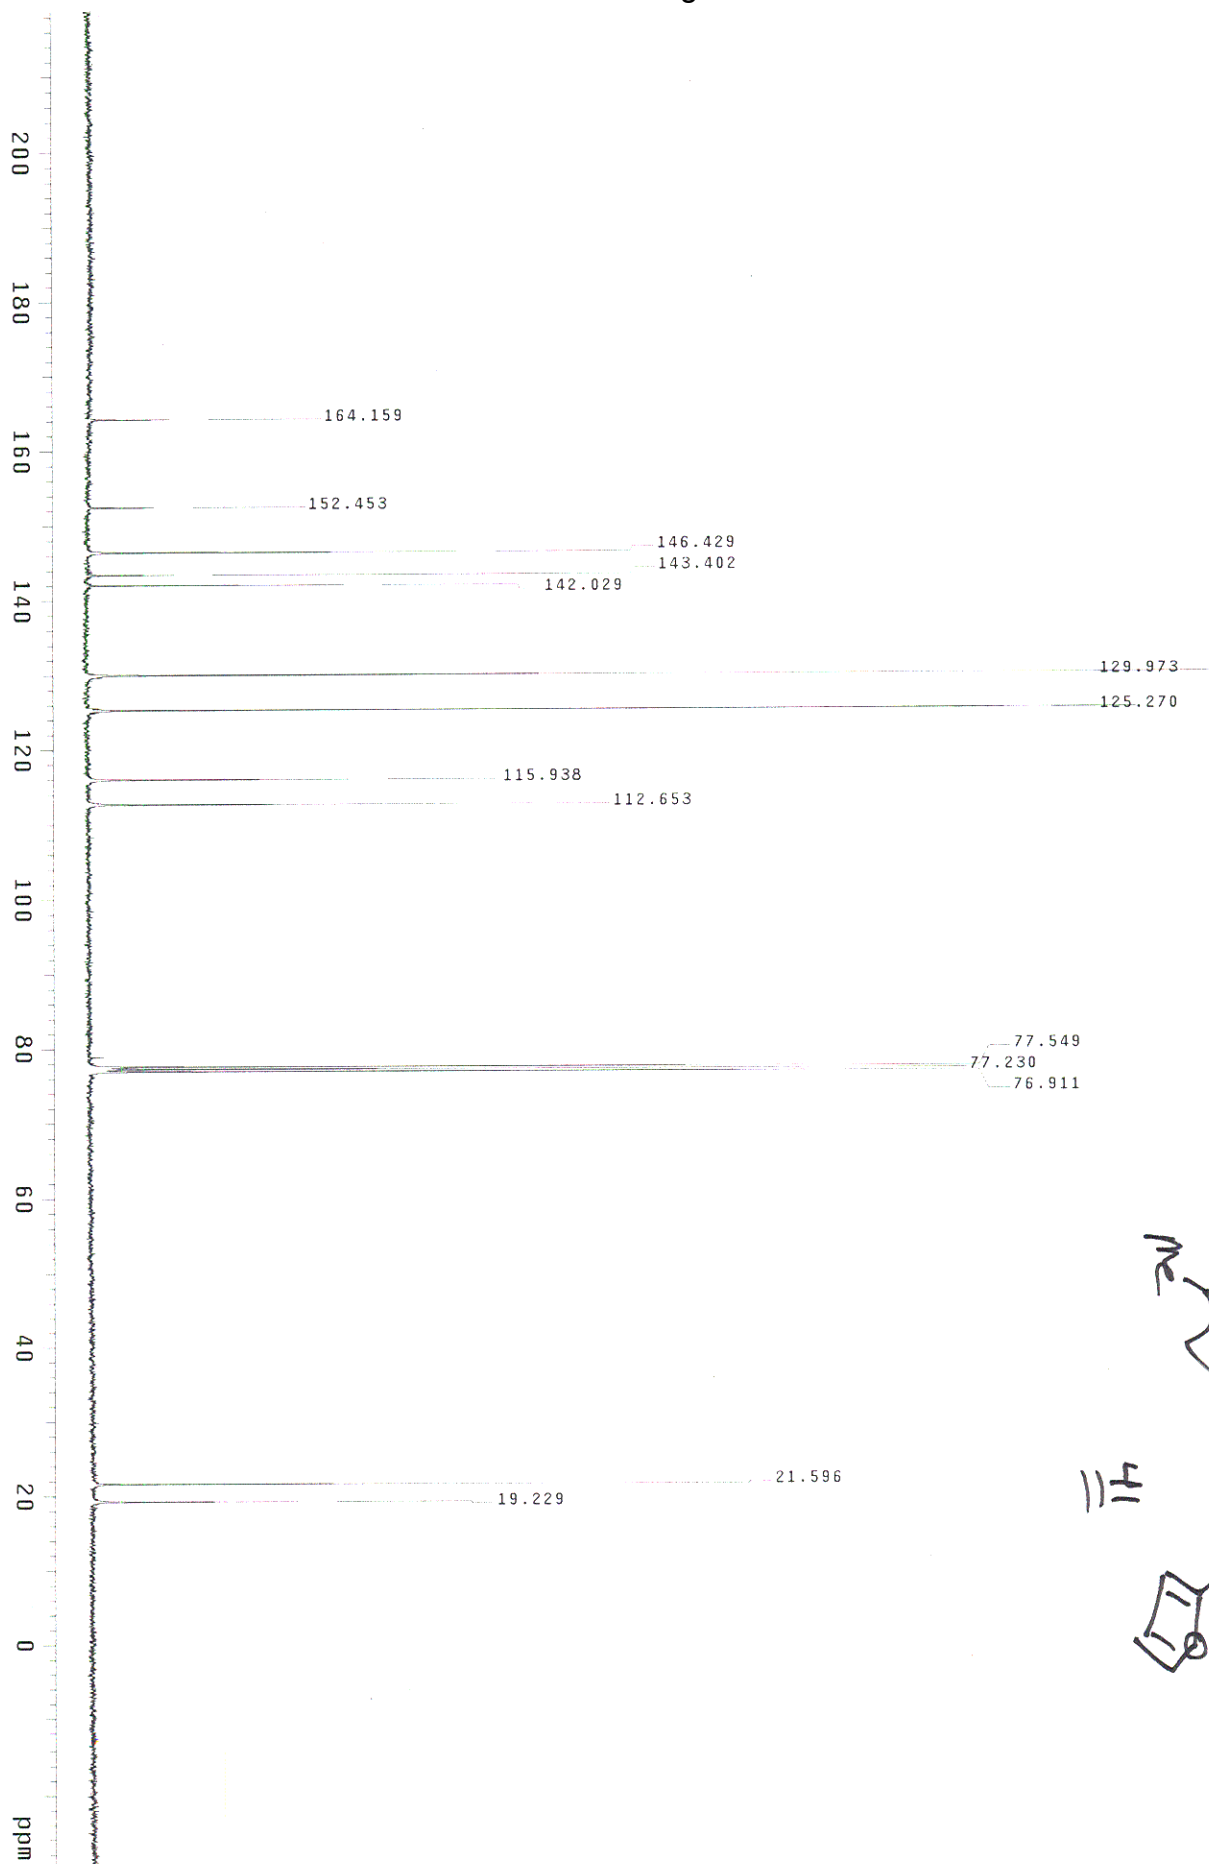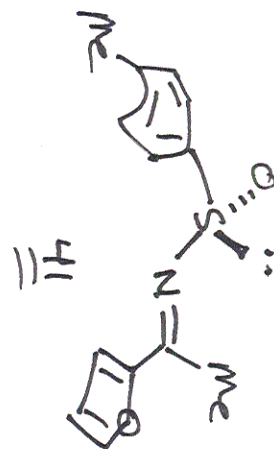

Supplement: Supplementary file 1 [file 4757014]
